# Supplementary material for: Sudden large-volume detachments of low-angle mountain glaciers –more frequent than thought
Source: Copernicus journal article supplement (doi:10.5194/tc-2020-243), 2020-10-22
Supplement: Supplementary file 1 [file tc-2020-243-supplement.pdf]

## SUPPLEMENT TO

### Sudden large-volume detachments of low-angle mountain glaciers – more frequent than thought

**Table S1: Existing literature for the low-angle glacier detachment events and summary remarks where and how the present study extends existing knowledge.**

| Name of event | Literature                                                                                                                                                                                                                                                                                             | Contribution from the present work                                                                                                                                                                                    |
|---------------|--------------------------------------------------------------------------------------------------------------------------------------------------------------------------------------------------------------------------------------------------------------------------------------------------------|-----------------------------------------------------------------------------------------------------------------------------------------------------------------------------------------------------------------------|
| Devdorak      | Reineggs, 1796; Viskovatov, 1864; Statkowski, 1877, 1879; Stebnitsky, 1877; Khatisyan, 1889; Zaporozhchenko, Chernomorets, 2004; Petrakov et al., 2008; Chernomorets, 2014; Tavasiev, Galushkin, 2014; Dokukin et al., 2015; Asoyan, Rototaeva, 2016; Chernomorets et al., 2016; Tielidze et al., 2019 | Compilation of referenced work and interpretation with respect to glacier detachments in general. Existing work supplemented by own satellite observations, development after 2014, slopes and permafrost conditions. |
| Kolka         | Haeberli et al., 2004; Kotlyakov et al., 2004; Huggel et al., 2005; Drobyshev, 2006; Evans et al., 2009b                                                                                                                                                                                               | Compilation and interpretation of existing work; glacier slope and permafrost information added; interpretation modified                                                                                              |
| Rasht         | Dokukin et al. 2019                                                                                                                                                                                                                                                                                    | Many new observations added to the short descriptions available in literature, and discussion with respect to glacier detachments in general                                                                          |
| Aru           | Tian et al., 2017; Kääb et al., 2018; Gilbert et al., 2018                                                                                                                                                                                                                                             | Summary of existing work and discussion with respect to glacier detachments in general                                                                                                                                |
| Amney Machen  | Paul, 2019                                                                                                                                                                                                                                                                                             | Most information based on literature, but the 2019 event was added, some date estimates improved, permafrost information added, and interpretations modified.                                                         |
| Sedongpu      | Tong et al., 2018; Liu et al., 2019; Chen et al., 2020                                                                                                                                                                                                                                                 | Mainly own observations and conclusions, compared to list of events available in literature (focus in literature is on river damming), and discussion with respect to glacier detachments in general                  |
| Flat Creek    | Jacquemart et al., 2020; Jacquemart and Loso, 2019                                                                                                                                                                                                                                                     | Volume estimation of 2016 event is new, otherwise mainly summary of existing work and discussion with respect to glacier detachments in general.                                                                      |
| Aparejo       | Ugalde et al., 2015; Ugalde, 2016; Ugalde et al., 2017; Marangunic, 1980                                                                                                                                                                                                                               | Mainly summary of existing work                                                                                                                                                                                       |
| Leñas         | Falaschi et al., 2019                                                                                                                                                                                                                                                                                  | Mainly summary of existing work and discussion with respect to glacier detachments in general                                                                                                                         |
| Tinguiririca  | Iribarren Anaconda et al., 2015                                                                                                                                                                                                                                                                        | Many new observations and interpretations added to existing short description in literature, and discussion with respect to glacier detachments in general                                                            |

## Supplementary Figures

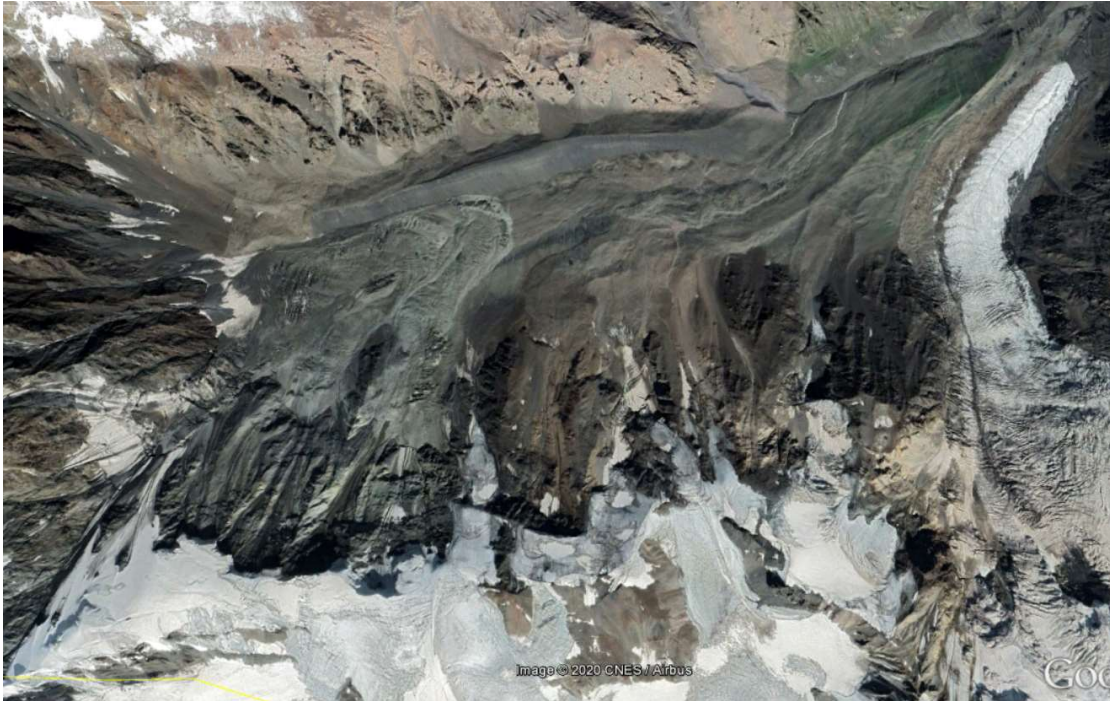

**Fig. S1: Situation of Kolka Glacier, 14 Sept 2019 (© GoogleEarth, CNES/Airbus).**

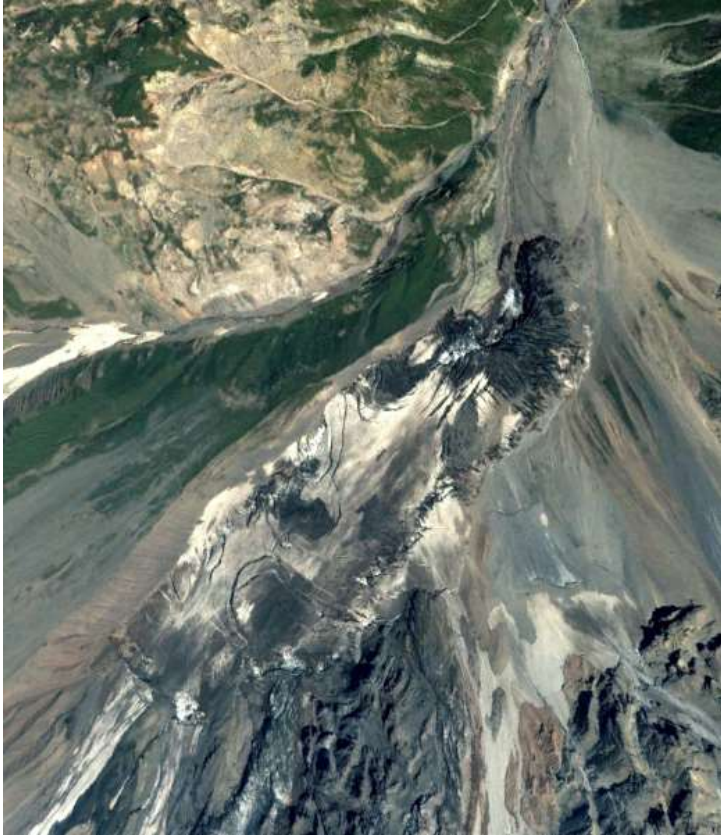

**Fig. S2: Rasht valley glacier that detached in 1919 on 30 Jul 2007 (© GoogleEarth, Maxar)**

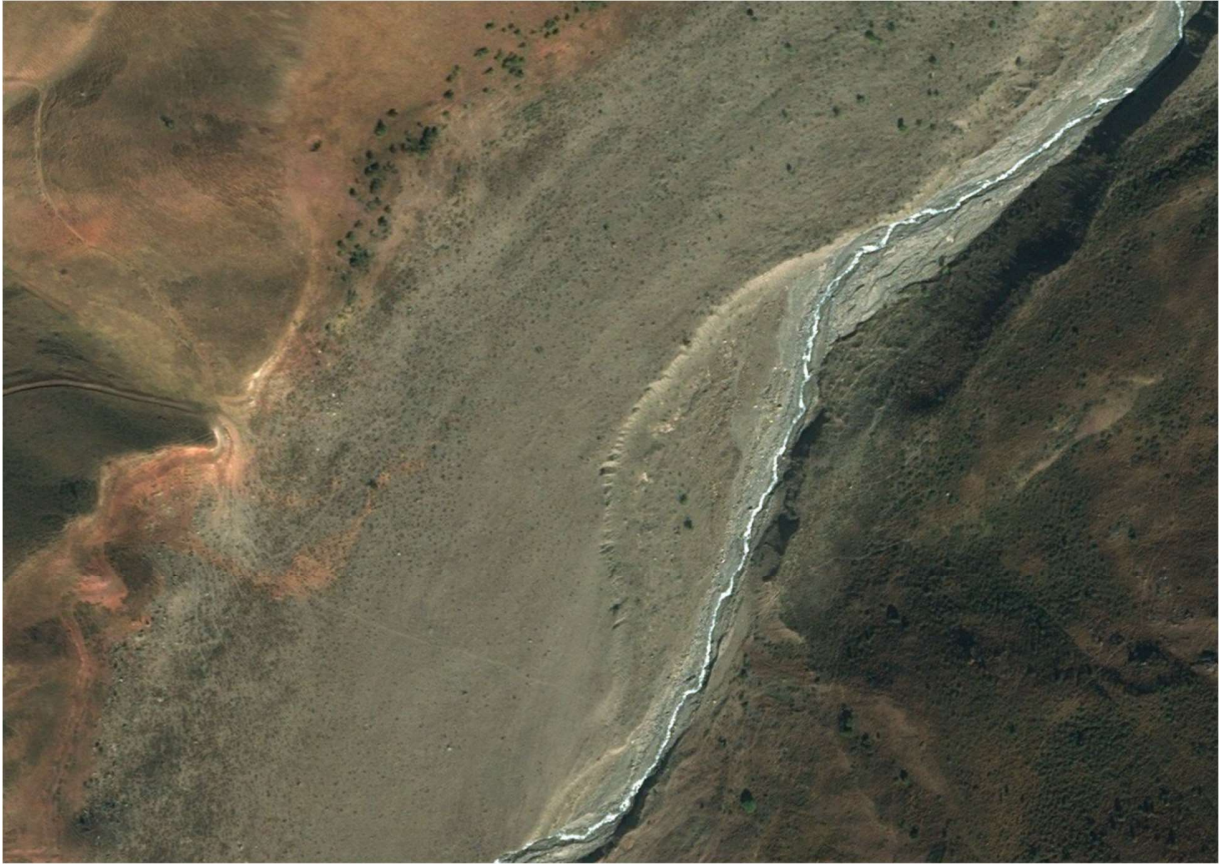

**Fig. S3: Later deposit area of the Rasht 2019 detachment showing features of a potential earlier ice-rock avalanche (streamlined features to the middle and lower part; rough chaotic microtopography to the upper right). (© GoogleEarth, Maxar).**



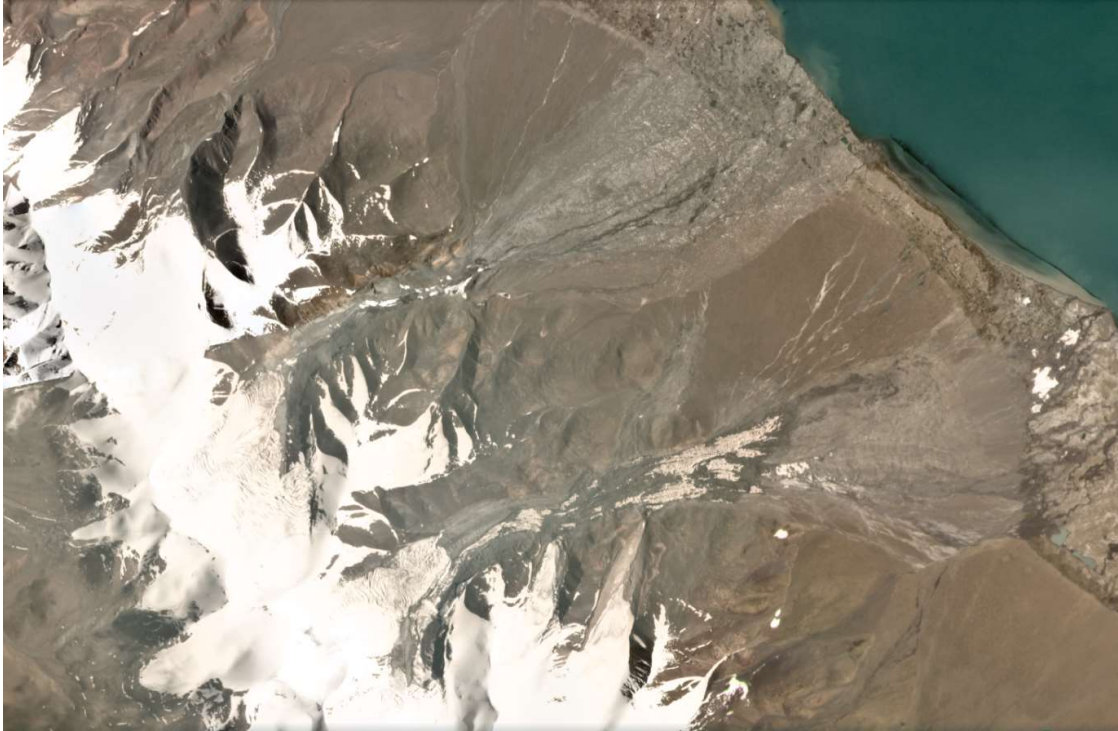

**Fig. S4: Situation of the two Aru glaciers in July 2020 (© Planet).**

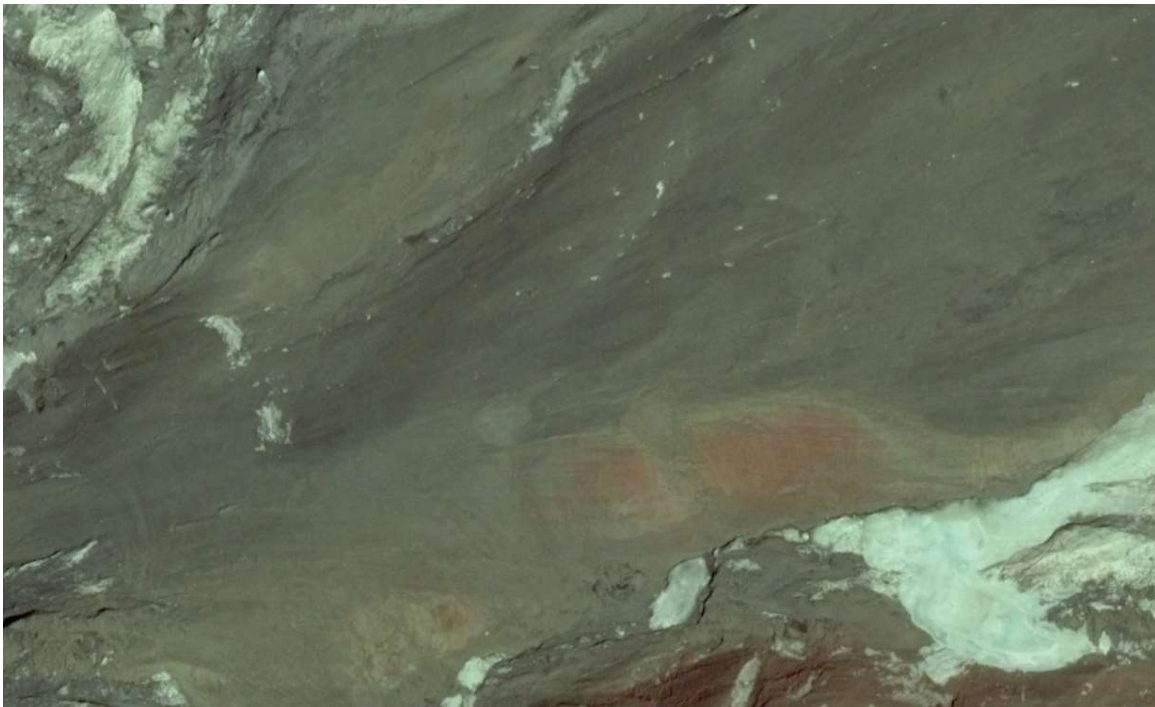

**Fig. S5: Striations in the path of the Aru-1 avalanche. 27 Feb 2017 (© GoogleEarth, Maxar).**

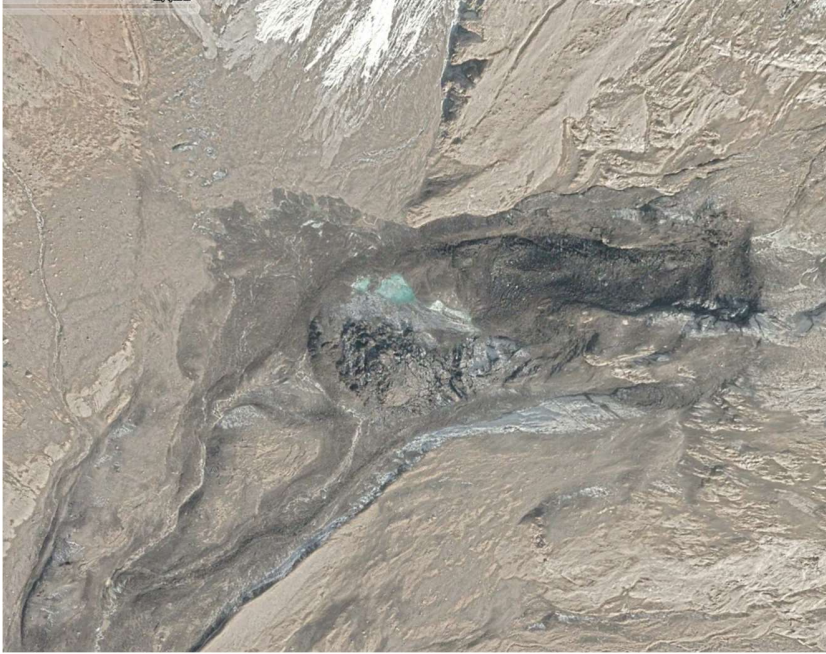

**Fig. S6: Detail of Sedonpgu Glacier 4 Dec 2017 (© GoogleEarth, Maxar)**

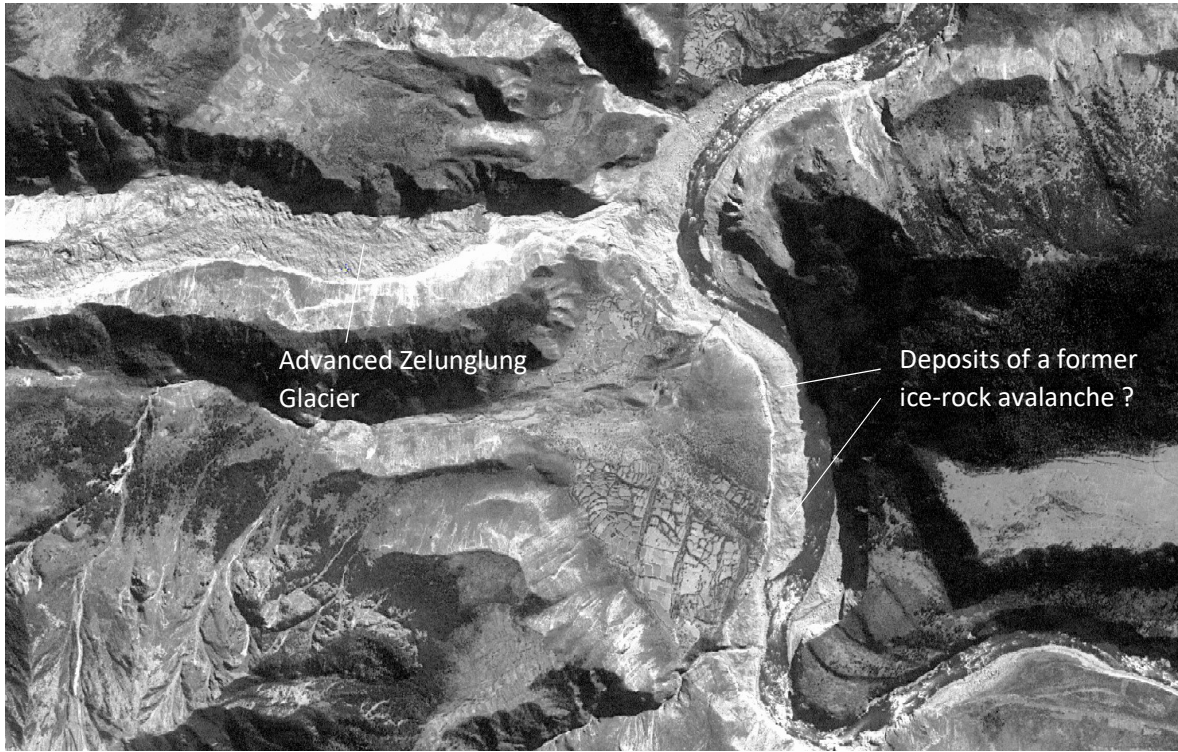

**Fig. S6: Corona image of 1969 over Zelunglung Glacier.**
