# Supplementary material for: Sudden large-volume detachments of low-angle mountain glaciers –more frequent than thought
Source: Copernicus journal article supplement (doi:10.5194/tc-2020-243), 2020-10-22
Supplement: Supplementary file [file tc-2020-243-RC2-supplement.pdf]

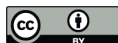

## 2 Sudden large-volume detachments of low-angle mountain glaciers – more frequent than thought

4

Andreas Kääb<sup>1</sup>, Mylène Jacquemart<sup>2</sup>, Adrien Gilbert<sup>3</sup>, Silvan Leinss<sup>4</sup>, Luc Girod<sup>1</sup>, Christian Huggel<sup>5</sup>,  
6 Daniel Falaschi<sup>6,7</sup>, Felipe Ugalde<sup>8,9</sup>, Dmitry Petrakov<sup>10</sup>, Sergey Chernomorets<sup>10</sup>, Mikhail Dokukin<sup>11</sup>,  
Frank Paul<sup>5</sup>, Simon Gascoin<sup>12</sup>, Etienne Berthier<sup>13</sup>, Jeff Kargel<sup>14,15</sup>

8

<sup>1</sup> Department of Geosciences, University of Oslo, Norway

10 <sup>2</sup> Cooperative Institute for Research in Environmental Sciences, University of Colorado at Boulder, United States

<sup>3</sup> Université Grenoble Alpes, CNRS, IGE, Grenoble, France

12 <sup>4</sup> Institute of Environmental Engineering, ETH Zurich, Switzerland

<sup>5</sup> Department of Geography, University of Zurich, Switzerland

14 <sup>6</sup> Instituto Argentino de Nivología, Glaciología y Ciencias Ambientales, Mendoza, Argentina

<sup>7</sup> Departamento de Geografía, Facultad de Filosofía y Letras, Universidad Nacional de Cuyo, Mendoza, Argentina

16 <sup>8</sup> Geostudios, San José de Maipo, Chile

<sup>9</sup> Departamento de Geología, Facultad de Ciencias Físicas y Matemáticas, Universidad de Chile, Santiago, Chile

18 <sup>10</sup> Faculty of Geography, M.V.Lomonosov Moscow State University, Moscow, Russia

<sup>11</sup> High-Mountain Geophysical Institute, Nalchik, Russia

20 <sup>12</sup> CESBIO, Université de Toulouse, CNES/CNRS/INRA/IRD/UPS, Toulouse, France

<sup>13</sup> LEGOS, CNES, CNRS, IRD, UPS, Université de Toulouse, Toulouse, France

22 <sup>14</sup> Department of Hydrology and Atmospheric Sciences, University of Arizona, Tucson, AZ, USA

<sup>15</sup> Planetary Science Institute, University of Arizona, Tucson, AZ, USA

24

*Correspondence to:* Andreas Kääb (kaeab@geo.uio.no)

### 26 **Abstract.**

The detachment of large parts of low-angle mountain glaciers, resulting in massive ice-rock avalanches, have so far been  
28 believed to be a unique type of event, made known to the global scientific community first for the 2002 Kolka Glacier  
detachment, Caucasus Mountains, and then for the 2016 collapses of two glaciers in the Aru range, Tibet. Since 2016, several  
30 so-far unknown glacier detachments have been discovered and described, and new ones have occurred. In the current  
contribution, we compile, compare and discuss 19 actual or possible large-volume detachments of low-angle mountain glaciers  
32 at nine different sites in the Caucasus, the Pamirs, Tibet, Alaska's St. Elias mountains, and the Southern Andes. Many of the  
detachments reached volumes in the order of 10–100 million m<sup>3</sup>. Communalities and differences between the cases investigated  
34 suggest that a set of different conditions drives a transient combination of factors related to low basal friction, high driving



stress, concentration of shear stress, and low resistance to exceed stability thresholds. Particularly, soft bedrocks below the detached glaciers seem to be a common condition among the observed events, as they offer smooth contact areas between the glacier and its substratum while being prone to till-strength weakening and eventually basal failure under high pore-water pressure. Surface slopes of the detached glaciers range between around  $10^\circ$  and  $20^\circ$ , possibly on the one hand low enough to enable development of thick and thus large-volume glaciers, and on the other hand steep enough to allow critical basal stresses to build up. Most of the ice-rock avalanches resulting from the detachments in this study have a particularly low angle of reach, down to around 0.1 (apparent friction angle), likely due to their high ice content and connected liquefaction potential, the ready availability of soft basal slurries and large amounts of basal water, and the smooth topographic setting typical for glacial valleys. Low-angle glacier detachments combine elements, and likely also physical processes of glacier surges and ice break-offs from steep glaciers. The surge-like temporal evolution ahead of several detachments or their geographic proximity to other surge-type glaciers suggests the glacier detachments investigated can be interpreted as endmembers of the continuum of surge-like glacier instabilities. Though rare, glacier detachments appear more frequent than previously thought and disclose, despite local differences in conditions and precursory evolutions, the fundamental and critical potential of low-angle soft glacier beds to fail catastrophically.

## 1 Introduction

Eighteen years after the detachment of Kolka Glacier in the Russian Caucasus, the 17 July and 21 September 2016 detachments of two neighbouring glaciers in the Tibet's Aru range directed attention at a new type of glacier instability that had been rarely observed and little described before (Gilbert et al., 2018; Kääh et al., 2018; Tian et al. 2017). The detachment of Kolka Glacier on 20 September 2002 released  $130 \cdot 10^6 \text{ m}^3$  of ice and rock that claimed  $\sim 120$  lives. Situated on a dormant volcano, it was long assumed that the Kolka Glacier catastrophe was unique and specific to the glacier's location on Mt. Kazbek (Haerberli et al., 2004; Huggel et al., 2005; Drobyshev, 2006; Evans et al., 2009b). The Aru twin glacier detachments – which released 68 and  $83 \cdot 10^6 \text{ m}^3$  of glacier ice – have recently raised the questions of whether and where such events may have happened before or need to be expected in the future, which factors (including climate change) ultimately allow low-angle glaciers to detach from their bed in such a catastrophic manner, and what this means for mountain hazard management. Indeed, several detachments similar to the Aru events, though smaller in magnitude, have been detected since (Faldaschi et al., 2019; Paul 2019; Jacquemart et al., 2020).

In contrast to glacier detachments, an extensively studied, though still not fully understood type of glacier instability is represented by glacier surges. Characterized by unusually high ice-flow speeds of up to tens of metres per day over large parts of a glacier, glacier surges last weeks to several years (Harrison and Post, 2003; Jiskoot, 2011; Harrison et al., 2015). Clusters of surge-type glaciers are found in many mountain regions around the world (Sevestre and Benn, 2015). The lowering of basal



66 glacier friction that is associated with surging involves abnormally high water pressure, change in the thermal regime, and/or  
responses of subglacial till to increasing shear stress and water input (Clarke et al., 1984; Kamb, 1987; Truffer et al., 2000;  
68 Fowler et al., 2001; Murray et al., 2003; Frappe and Clarke, 2007; Sevestre et al., 2015; Benn et al., 2019).

A second, well-known type of glacier instability happens over a wide range of magnitudes, from icefalls at steep glacier fronts  
70 to large ice avalanches, when partial or entire ice volumes suddenly break off from hanging glaciers that are typically steeper  
than around 30° (Alean, 1985; Huggel, 2009; Faillettaz et al., 2015). The latter empirical value from literature offers a slope  
72 threshold to separate the definitions of ice avalanches from glacier detachments. Impacts associated with ice avalanches, which  
typically have volumes much smaller than 1 10<sup>6</sup> m<sup>3</sup>, are usually limited to a few kilometres, unless the failed ice transforms  
74 into a highly mobile mass flow through liquefaction and incorporation of wet sediments or liquid water in the path (Petrakov  
et al., 2008; Evans and Delaney, 2015). Failure conditions and triggering factors of such steep ice avalanches typically include  
76 glacier geometry (steep ramp-type glaciers, bedrock edges), bedrock topography (e.g. convex bed), atmospheric events (e.g.  
temperature increase), <sup>high</sup> strong accumulation rates, ice-thermal conditions (e.g. frozen base or changes therein), instabilities of  
78 the underlying bedrock that take with them ice resting on it, or seismic events (Alean, 1985; van der Woerd et al., 2004;  
Huggel, 2009; Fischer et al., 2013; Faillettaz et al., 2015).

80 Our third type of glacier instability, a sudden large-scale detachment of a mountain glacier, is much less frequent than the two  
types above, but shows a mobility at least as high as ice avalanches combined with the large volumes typically involved in  
82 glacier surges, and can thus constitute a severe threat to communities and settlements located in remote areas.

In general, mass movements that result from sudden slope failures in ice- or snow-rich mountain environments are often  
84 particularly mobile, leading to strongly increased run-out distances compared to ice/snow-free conditions (Petrakov et al.,  
2008; Huggel, 2009; Schneider et al., 2011; Evans and Delaney, 2015). Frictional heating melts ice and snow components,  
86 which are either part of the initial slope failure or incorporated along the avalanche path. Liquid water, embedded in the glacier  
and sediments before detachment, can amplify the avalanche mobility. Also ice and snow surfaces, in case the avalanche  
88 travels over those, are able to reduce basal friction. Here, we define sudden large-volume glacier detachments through their  
actual initiation, while the eventually resulting ice-rock avalanches, or other types of mass flows, might be similar to those  
90 resulting from other high-mountain slope instabilities. By terming these events *glacier detachments*, we follow the suggestion  
by Evans and Delaney (2015) who describe the Kolka case as large-scale detachment of a valley glacier. Other authors, for  
92 instance, called these failure events glacier slides, in reference to landslides (Petrakov et al., 2008), or glacier collapses (Kääb  
et al., 2018).

94 Our following selection focusses on detachments (much) larger than 1 10<sup>6</sup> m<sup>3</sup> and from glaciers with surface slopes of lower  
than around 20°, i.e. focussing on glaciers from which large-volume detachments were so far typically not expected. In setting  
96 these criteria, we are well aware that it can be reasonable to include other events beyond this coarse selection in other types of  
analyses, depending on the goal of the investigation. The main scientific purpose of this paper is to provide an overview of all



98 known glacier detachment events, either by summarizing existing detailed studies, or by providing such details for the first  
time (see Suppl. Tab. S1 for existing studies and new contributions by the present work). We aim to show and discuss the  
100 relation of low-angle glacier detachments to glacier surges and the continuum of high-mountain ice and rock instabilities. The  
main applied purpose of our study is to make experts involved in high-mountain hazard management aware of the so far little  
102 recognized possibility for glacier detachments and to discuss related potential key indicators.

## 2 Ice-rock avalanches

104 Ice-rock avalanches can be the result of very different initial types of slope failures and event cascades. A wide range of  
magnitudes, avalanche compositions and impacts have been observed (Schneider et al., 2011). In this section, we exemplify  
106 the diverse characteristics of ice-rock avalanches and the resultant mass flows in order to contrast them to sudden large-volume  
detachments of mountain glaciers. Schneider et al. (2011) compiled a large inventory of ice-rock avalanches and analyzed the  
108 relation between avalanche mobility and volume, ice and water content, topography, as well as the presence of low-friction  
surfaces. We use their extensive data collection as background data set for our study, extended by events from Petrakov et al.  
110 (2008), who concentrated on an event type they term catastrophic glacier multi-phase mass movements. In Fig. 1, each event  
of this combined data set is plotted as a gray circle according to its horizontal reach (L), elevation difference (H) and  
112 detachment volume (V). The size of the circles in Fig. 1a indicates the event volumes. The ratio H/L is the apparent friction  
coefficient or the angle of reach, called also “Fahrböschung”, calculated from the uppermost scarp of the slope failure to the  
114 lowermost part of the mass movement deposits.

The event collection of Fig.1 includes a wide range of ice-rock failure and mass movement types. Dark grey circles mark the  
116 following examples, standing out mainly by type, volume and angle of reach:

- In the 1970 Huascarán (Peru) event (a similar smaller event took place in 1962), a rock-wall failure triggered by a M7.9  
118 earthquake, incorporated large amounts of ice from above and below it, leading to a highly mobile and far reaching rock-  
ice avalanche of  $80 \cdot 10^6 \text{ m}^3$  that claimed up to 20'000 lives (e.g., Evans et al., 2009a). In Fig. 1, we use the solid deposits  
120 of the avalanche to define its reach and elevation difference, neglecting that a subsequent water/mud flood travelled much  
further (indicated by \* symbols in Fig. 1). The 1970 Huascarán avalanche is one of the largest, farthest reaching, and the  
122 by far deadliest known, stressing the full catastrophic potential of ice-rock avalanches.
- A rock failure in the Chilean Andes in 1987 incorporated ice, snow and water which transformed the avalanche into a  
124 debris flow of  $15 \cdot 10^6 \text{ m}^3$  that sped down the Estero Parraguirre valley and killed more than 37 people (Hauser, 2002). In  
our collection, this is the farthest-reaching event (lowest angle of reach; H/L  $\sim 0.12$ ) that did not originate as a glacier  
126 detachment.
- The 1964/65 Allen Glacier event, Alaska, is an example for a very large rock avalanche, likely triggered by an earthquake,  
128 that was able to run out over an abnormally low angle because it landed on a glacier (Post, 1968). Neighbouring glaciers



show similar rock deposits from the same time, and also later earthquakes caused comparable rock avalanches that travelled  
130 far over low-angle glaciers (e.g., Shugar et al., 2012).

- In 1895,  $5 \cdot 10^6 \text{ m}^3$  of at least partially cold-based ice sheared off  $40^\circ$ -steep bedrock of malm limestone underlying Altels  
132 Glacier in the Swiss Alps (glacier surface slopes indicated as numbers within the circles in Fig. 1a). The resulting ice  
avalanche rushed up the opposite side of the valley and thus did not reach its maximum runout distance (indicated by  $\rightarrow$   
134 symbols in Fig. 1; Faillettaz et al., 2011). The Altels event is an example of a very large, pure ice avalanche, stemming  
from the detachment of a very steep glacier. Until it sheared off, the glacier was probably held in place by transverse  
136 bedrock riegels and cold patches/zones where it was frozen to its bed (Wagner, 1996).
- A number of ice-rock avalanches have occurred from different locations on Iliamna volcano, Alaska, the last of which is  
138 documented for June 2019 (Toney et al., 2020). Failure surfaces were typically on the order of  $40^\circ$ , and volumes reached  
up to around  $20 \cdot 10^6 \text{ m}^3$  (Caplan-Auerbach and Huggel, 2007; Huggel et al., 2007). These events show that enhanced  
140 geothermal heat fluxes can be involved in causing ice-rock avalanches.

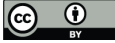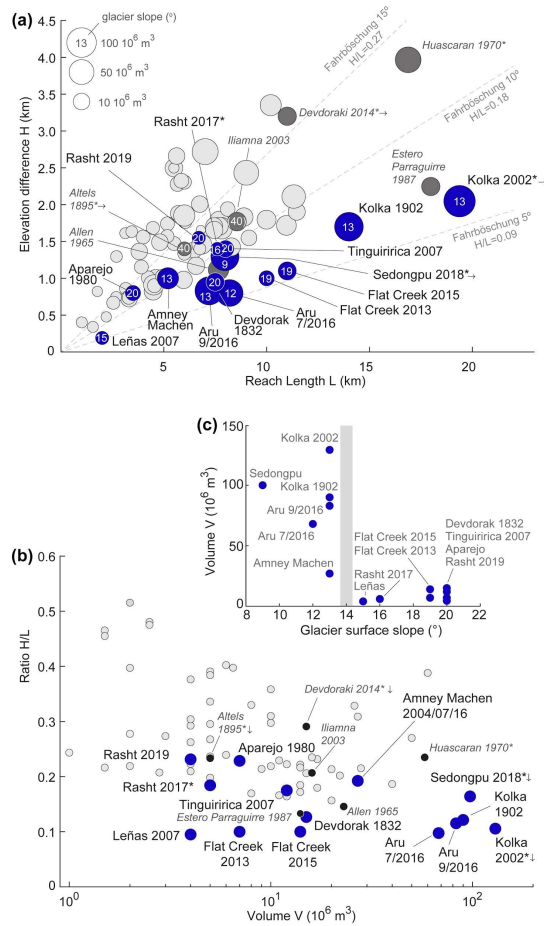

142

144 **Figure 1: (a) Known avalanches of rock-ice mixtures plotted by elevation drop H versus Reach L. The event volumes**  
 146 **are indicated by circle size (see legend). Blue circles are sudden large-volume detachments of low-angle mountain**  
 148 **glaciers, with the surface slope of the detached glacier parts given in white numbers on the circles. The grey circles are**  
 150 **other ice-rock avalanche events, with dark grey events mentioned specifically in the text to illustrate different event**  
 152 **types collected in this figure. The diagonal dashed lines indicate the angle of reach, Fahrböschung, at 5°, 10° and 15°.**  
 154 **(b) Events from (a) plotted by apparent friction coefficient (elevation drop H / Reach L) versus avalanche volume V. Note the logarithmic scale of the x-axes (volume). Most events stem from Schneider et al. (2011), extended by data from Petrakov et al. (2008) and the present study. \* after the event name indicates that a mud or debris flow continued from the rock-ice avalanche deposits, which is not considered in the calculation of the reach. Arrows behind the event name indicate that the avalanche was stopped by some obstacle and would have otherwise travelled further. The direction of the arrow indicates the direction in which the event symbol would have shifted in the plot without the obstacle. (c) Glacier detachment volume against glacier surface slope.**

otherwise



### 3 Glacier detachment events

156 In the following, we summarize events that we categorize as glacier detachments, i.e. large-volume ice-rock avalanches from  
157 the sudden failure of low-angle parts of mountain glaciers (blue circles in Fig.1). Based on previously published findings from  
158 several of the events, we focus our descriptions specifically on disposition factors that could contribute to or hint at the presence  
159 of particularly low basal friction and high <sup>driving</sup> ~~shear~~ stresses. These factors include soft sediments, polythermal ice conditions,  
160 abnormal geothermal heat flux, high water input and basal water pressure, glacier surging, or significant steepening in surface  
161 slope. As it has been shown that ~~also~~ <sup>also</sup> thermal conditions can play a role in the detachments of glaciers (Gilbert et al., 2018;  
162 Jacquemart et al., 2020), we also try to evaluate permafrost conditions for each event.

We sort the following events by regions, and proceed within the regions from short summaries of well-documented events to  
164 more detailed descriptions of not or little studied cases. Discussions of individual events, e.g. regarding pre-satellite era events  
165 or a possible recurrence by glacier recovery, are included in the respective subsections, whereas the main discussion section 4  
166 focuses on the overall comparison between events.

#### 3.1 Mount Kazbek, Caucasus mountains

##### 168 3.1.1 Devdorak, 18<sup>th</sup> century, 19<sup>th</sup> century, 2014

A number of glacier detachments and rock-ice avalanches happened around Mt. Kazbek at the border between Russia and  
170 Georgia. During the 18-19<sup>th</sup> centuries, surges of the Devdorak (Devdoraki in Georgian language) Glacier on the north-eastern  
171 flank of Mount Kazbek (Fig. 2; Tab.1) were moving along the Amilishka River (Kabakhi River in its lower part), which drains  
172 the glacier, in 1776, 1778, 1785, 1808, 1817, and 1832 (Zaporozhchenko and Chernomorets, 2004). On August 13, 1832, parts  
173 of the surging Devdorak glacier tongue detached and the subsequent ice-rock avalanche blocked the main Terek valley, an  
174 important transportation route between Russia and Georgia (Petraikov et al., 2008). Eyewitness of the 1832 event, engineer-  
175 captain Grauert estimated a volume of  $15.5 \cdot 10^6$  m<sup>3</sup> of ice and rock mass blocked the Dariali Gorge of the Terek valley  
176 (Zaporozhchenko and Chernomorets, 2004). The causes and mechanisms of this (and other) detachments are not well known,  
177 and vary throughout the literature. Ice-rock avalanching on the glacier, overloading and associated increase in subglacial water  
178 pressure could well have played a role.

Except for their source area, these at their time well known “Kazbek blockages” followed the same avalanche path as the 2014  
180 Devdoraki event described below. Therefore, the 1832 event could instead have been similar to the 2014 event, starting as a  
181 rock failure rather than a surge (Chernomorets, 2014, Chernomorets et al., 2016).

182 In 2014, parts of a rock wall and overlying hanging glaciers failed from Mount Kazbek (Figs. 2-3). The resulting highly mobile  
183 rock-ice avalanche of  $2\text{-}5 \cdot 10^6$  m<sup>3</sup> rushed down the Amilishka / Kabakhi Valley and blocked the main road between Russia and



184 Georgia, killing 9 people (Chernomorets et al., 2016; Tielidize et al., 2019). This event might also have had a longer runout  
(Fig. 1) but was stopped by a sharp 90°-turn at the confluence of the Devdoraki gorge and the Dariali (or Terek) gorge.

186 Currently, the entire narrow lower part of Devdorak Glacier has a surface slope of around 23°, its tongue closer to 17°. The  
volcanic nature of Mount Kazbek, the documentation of a number of violent mass flows from the mountain in the past  
188 (Chernomorets et al., 2007), field visits, and visual analysis of very high resolution satellite images and terrestrial photos all  
suggest highly erodible rock and an abundance of fine sediments at many places on Mount Kazbek. On all high-resolution  
190 satellite images available since around 2002 (GoogleEarth, Bing Maps, Maxar, Pleiades), Devdorak Glacier appears heavily  
crevassed, and is partly covered by fine sediments, likely deposited by mass movements from the surrounding mountain flanks.

192 Since 2015, a glacier directly south of Devdorak Glacier has been overriding the main tongue of Devdorak glacier in a surge-  
like destabilisation, perhaps triggered by the 2014 Kazbek/Devdoraki rock-ice avalanche that overran it (Fig. 3). Possibly as a  
194 consequence of the tributary surge, Devdorak Glacier itself is currently also advancing (Dokukin et al., 2020). A 1-km global  
permafrost model (Obu et al., 2019), not particularly tuned for mountain permafrost, though, suggests the elevation of the  
196 Devdorak Glacier tongue is roughly at or below today's lower boundary of the discontinuous permafrost zone in the region.

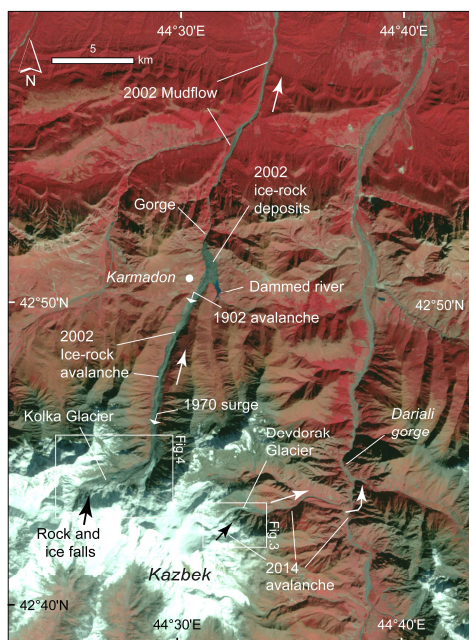

198



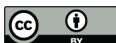

200 **Figure 2: Overview over Mount Kazbek, Russia/Georgia, Caucasus Mountains, with elements of the 2002 Kolka/Karmadon and 2014 Devdoraki rock-ice avalanches indicated. Satellite image: Landsat, 6 Oct 2002.**

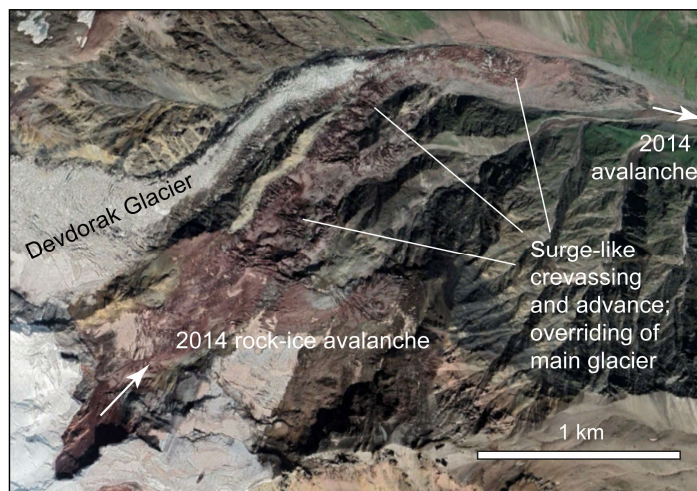

202 **Figure 3: Lower part of Devdorak Glacier and northeastern flank of Mount Kazbek. The position of the image section is indicated in Fig. 2. Satellite image: Pleiades, © Airbus, 19 Aug 2019.**

204

### 3.1.2 Kolka, 1902 and 2002

206 The  $130 \cdot 10^6 \text{ m}^3$  Kolka Glacier detachment (Figs. 2 and 4, Tab. 1) of 20 September 2002 has been described and discussed in  
a number of studies (Haerberli et al., 2004; Kotlyakov et al., 2004; Huggel et al., 2005; Drobyshev, 2006; Evans et al., 2009b).  
208 During these investigations, it became clear that a similar event must have already happened at least once, at the beginning of  
July 1902 (and probably also around 1700), whereby the glacier tongue detached after a roughly two-week long surge-like  
210 advance. Heavy rain and snow melt may have played a role in triggering the 1902 advance. Damming or erosion by water  
could then have caused the actual detachment and subsequent rock/mud/ice flow (Drobyshev, 2006; Petrakov et al., 2008;  
212 Kotlyakov et al., 2010b). The glacier surged again in autumn/winter 1969/1970 and advanced by 4 km with speeds of up to  
220 m/day (Fig. 4), but without catastrophic consequences (Hoinkes, 1972; Rototayev et al., 1983). It is not known to us,  
214 which differences in conditions, compared to 1902 and 2002, caused the glacier to not detach in 1970. Several other glaciers  
in the Caucasus are known to have surged in the past (Kotlyakov et al., 2010b). We found that Kolka Glacier had a low surface  
216 slope of around  $13^\circ$  prior to the 2002 detachment. Evans et al (2009b) estimated a bed slope of  $9^\circ$  after the detachment. Over  
the course of several weeks before the 2002 detachment, perhaps triggered by earthquakes (Kotlyakov et al., 2004), heavy rock  
218 and ice falls from the northern flank of the Kazbek massif deposited several  $10^6 \text{ m}^3$  of material on the glacier. During this



period of mass-wasting activity, the glacier changed in unusual ways: it bulged and became heavily crevassed (Fig. 4), it developed a scarp at the location of the later detachment, and supraglacial ponds formed (Kotlyakov et al., 2004; Evans et al., 2009b; Kotlyakov et al., 2010b). Unusually high geothermal heat fluxes underneath the glacier (fumaroles and sulphur smell were reported <sup>from</sup> in the glacier bed shortly after detachment), the impact energy of a large rock/ice fall, and successive loss of shear stress due to excess water pressure have been proposed as possible factors and ultimate triggers of the 2002 detachment (Kotlyakov et al., 2004; Evans et al., 2009b; Kotlyakov et al., 2010b). Similarly, the additional loading of Kolka Glacier from the rock and ice falls has more recently been proposed to have increased the basal shear stress until it exceeded a frictional threshold given by the glacier bed material, topography, and hydraulic conditions (Kääb et al., 2018). After the detachment, lakes were visible on the Kolka Glacier bed, pointing to the involvement of large amounts of subglacial water in the detachment. The high mean avalanche velocities of 50-80 m/s (Huggel et al., 2005) suggest availability of large amounts of water and/or saturated fine-grained till.

The Kolka Glacier tongue is, like Devdorak Glacier, roughly at the lower elevation of the regional discontinuous permafrost zone, and the glacier must have been temperate throughout, except for the likely polythermal, or even cold steep hanging glaciers avalanching from the northern flank of the Kazbek massif onto its surface. The ice-rock avalanche resulting from the 2002 detachment is described in detail in the above literature about the event, but we want to draw attention to the streamlined debris stripes, in the following called striations, that were visible in the detachment zone after the event (Fig. 4d; Huggel et al., 2005), because similar patterns have also been found in several of the other cases of this study. Currently, the detached glacier depression is refilling and the glacier is gaining mass again. The fast recovery of the glacier volume between the 1970 surge and 2002, and again after the 2002 detachment, is associated with Kolka Glacier's positive mass balance, which stands in stark contrast to the predominant strong glacier shrinkage in the Caucasus Mountains (Kutuzov et al., 2019; Zemp et al., 2019). Kolka Glacier had already reached almost 50% of its pre-detachment volume by 2017 and is projected to accumulate 60–70% of its pre-detachment volume by 2025 (Petrakov et al., 2018; Aristov et al., 2019).

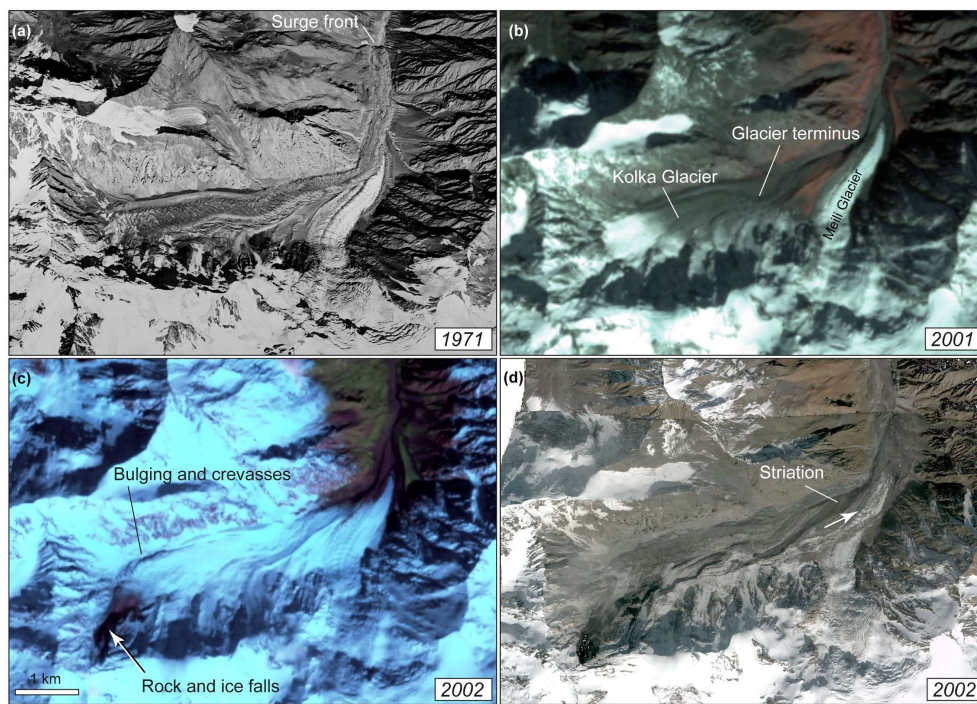

242 **Figure 4: Kolka Glacier, Mount Kazbek. (a) Kolka Glacier surged in 1969/70. Satellite image: Corona, 20 Sep 1971. (b)**  
244 **Landsat image, 3 Oct 2001. (c) Days and weeks before the 2002 detachment, rock and ice falls/avalanches were observed**  
246 **onto the glacier, and the left lateral margin of the glacier was bulged and heavily crevassed. Satellite image: Landsat,**  
**20 Sep 2002, a few hours before detachment. (d) Quickbird satellite image (© Maxar), 25 Sep 2002, 5 days after**  
**detachment. The position of the image sections is indicated in Fig. 2.**

### 248 3.2 Rasht, Pamir/Tajikistan

In 2017 and 2019, two glacier detachment events happened on the north side of the Peter the First Range (or Petra Pervogo  
250 Range, or Peter the Great Range), in the Pamir Mountains of Tajikistan. The resulting mass flows of both events flowed north  
into the Rasht Valley through which the Surkhob River flows that later forms the Vakhsh River (Fig. 5).



### 252 3.2.1 Event of 2017

The 2017 event, first mentioned in Dokukin et al. (2019), happened between 10 and 11 July 2017 (Planet images). A glacier  
254 of roughly 1000 m length and 240 m width detached (upper scarp ca. at 3600 m a.s.l.) and the resulting ice-rock avalanche  
flowed down a narrow valley towards the village Tojikabod in the Rasht Valley (Figs. 5 and 6, Tab. 1). In satellite imagery  
256 taken shortly after the event (Planet, Maxar), ice remains can be recognized over a horizontal distance of about 8 km, down to  
an elevation of about 2160 m a.s.l. Beyond this point, a considerable debris/mud flow must have continued for another 2 km  
258 or so. The detached glacier had a surface slope of around  $16^\circ$  (High Mountain Asia DEM; Shean, 2017). We measured  
increased surface speeds of up to 5.8 m/day in early July 2017 (compared to a few dm/day in 2016; velocities from repeat  
260 Planet data) and detected unusual lateral crevasses delineating the later detachment area in images from as early as May 2017  
(Fig. 6). The glacier is likely not surrounded by permafrost (Obu et al., 2019).

262 To roughly estimate the event volume we derive the ice thickness along the center flow line of the glacier based on an estimated  
basal shear assuming a driving stress of  $1.2 \cdot 10^5$  Pa as suggested for mountain glaciers, a slope of  $16^\circ$ , and a form factor of 0.8,  
264 which then results in a thickness of around 60 m (Cuffey and Patterson, 2010). Multiplying half of this depth (i.e. assuming a  
triangular cross-section) with the detached area (ca.  $200,000 \text{ m}^2$ ) gives a first volume estimate of roughly  $6 \cdot 10^6 \text{ m}^3$ . Whereas  
266 satellite images after detachment suggest that much of the glacier bed might actually have a triangular cross-section, it may  
have been more shallow in the lowermost and uppermost parts. As an order of magnitude, we suggest a detachment volume of  
268  $5 \cdot 10^6 \text{ m}^3$  and assign a conservative error of  $\pm 1 \cdot 10^6 \text{ m}^3$  to this estimate.

The cirque from which the 2017 event originated was also the source of other slope instabilities over recent years. Another  
270 (much smaller) ice-rock avalanche from a neighbouring glacier occurred between 15 and 24 July 2016 (dates from Planet  
images), with a horizontal reach of roughly 5.5 km. A large debris flow descended the same valley in late August 2016, starting  
272 from the same cirque, likely entraining deposits of the July 2016 avalanche, and reaching the Surkhob River 19.4 km  
downstream where it destroyed several buildings, bridges and agricultural fields.

### 274 3.2.2 Event of 2019

Between 2 and 3 August 2019 a second glacier, ca. 14 km to the west of the one that collapsed in 2017, detached (Figs. 5, 7).  
276 This glacier was slightly smaller than the 2017 one, and had a surface slope of around  $20^\circ$ . The resulting ice-rock avalanche  
travelled north down a narrow valley towards the Rasht Valley, over a horizontal reach of 6.5 km and a vertical drop from  
278 3350 (upper scarp) to 1850 m a.s.l. Superelevations of the ice-rock avalanche path of up to almost 200 m above valley bottom  
suggest high avalanche speeds (McClung, 2001). We estimated the detached volume in the same way as described for the 2017  
280 event (section 3.2.1) and computed a volume of  $4.5 \pm 1 \cdot 10^6 \text{ m}^3$  (glacier area ca.  $230,000 \text{ m}^2$ ; centreline depth 50 m). Based on  
pre- and post-event WorldView stereo DEMs Leinss et al. (2020) estimate a maximum erosion depth of 90 m and a detachment  
282 volume of  $8\text{-}9 \cdot 10^6 \text{ m}^3$ , i.e. significantly more than our rough general model.



284 This glacier also showed increased sliding speeds and crevassing around the later detachment area for at least 2-3 weeks before  
the failure. For the end of July 2019 we found surface speeds of roughly 2.5 m/day, a marked increase compared to roughly <  
0.1 m/day during 2017–2018 (repeat Planet data). The glacier did not show any visual signs of destabilisation between 2015  
286 and 2018 (Planet images). In 2007 (Maxar; see Supplement) the glacier looked heavily crevassed, possibly an indication of a  
surge-like advance. This condition is still visible in Landsat data 5-6 years later, though less certain due to the lower resolution  
288 of Landsat data (no other data is available to us between 2007 and 2015). Landsat data also suggest that the glacier experienced  
a similar advance in the early 1990s. Under the limitation of the reduced spatial resolution of the Landsat data, however, we  
290 do not find signs of a large detachment event or large ice-rock avalanche. Nevertheless, we draw attention to a surprisingly  
vegetation-free landform visible downstream of the 2019 detachment in pre-event imagery (Fig. 8). The lack of vegetation,  
292 the streamlined microtopography, and zones of rough and chaotic microtopography that resemble avalanche or debris flow  
deposits (Fig. 8; Supplement), led us earlier to interpret this landform as a possible geomorphological imprint of an ice-rock  
294 avalanche (Kääb, 2019). Meanwhile, this landform has been overrun by the August 2019 ice-rock avalanche, leaving in parts  
similar new forms, and suggesting that the landform now buried could have stemmed from a similar detachment event,  
296 probably before 1961 (year of earliest Corona satellite image). Between the 1961 Corona images and very high-resolution  
images from just before the 2019 avalanche no significant changes are visible on the landform.

298 Very-high resolution satellite images over the Peter the First Range suggest abundance of weak bedrock and fine sediments.  
All over the range, signs after large debris flows, rock avalanches or ice-rock avalanches are visible in high resolution satellite  
300 images (Maxar, CNES/Airbus, Planet; Leinss et al, 2020). The Pamirs in general are known to be geomorphologically very  
active, with a number of associated hazards (Mergili et al., 2012; Gruber and Mergili, 2013; Strom and Abdrakhmatov, 2018)  
302 and a cluster of surge-type glaciers (Kotlyakov et al., 2008; Kotlyakov et al., 2010a; Gardelle et al., 2013; Sevestre and Benn,  
2015; Lv et al., 2019). A number of glaciers in the Peter the Great Range are surging at the time of writing or have done so in  
304 the recent past (Fig. 5). Didal Glacier (ca. 12° steep) surged during the winter 2015/16 and advanced by 2.5 km over a few  
months. In the valley below Didal Glacier we note lack of vegetation in the valley and landforms that could well stem from a  
306 former ice-rock avalanche. Kotlyakov et al. (2010a) mention a 2.2 km long ice avalanche from Didal Glacier in 1974. In  
comparison, the bottom of the valley through which the 2017 ice-rock avalanche descended (section 3.2.1) was partly tree  
308 covered before, suggesting that no event like the 2017 one has happened there in the recent past.

Even if not documented in detail in an internationally accessible format so far, to our best knowledge, both the 2017 and 2019  
310 detachments and their downstream effects were very likely noted by the local communities as the lowermost ice/rock deposits  
stopped not far from settlements, agricultural fields, and pastures, and very-high resolution images (Maxar) show that flooding  
312 happened close to houses and two irrigation channel bridges were partially destroyed.

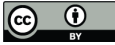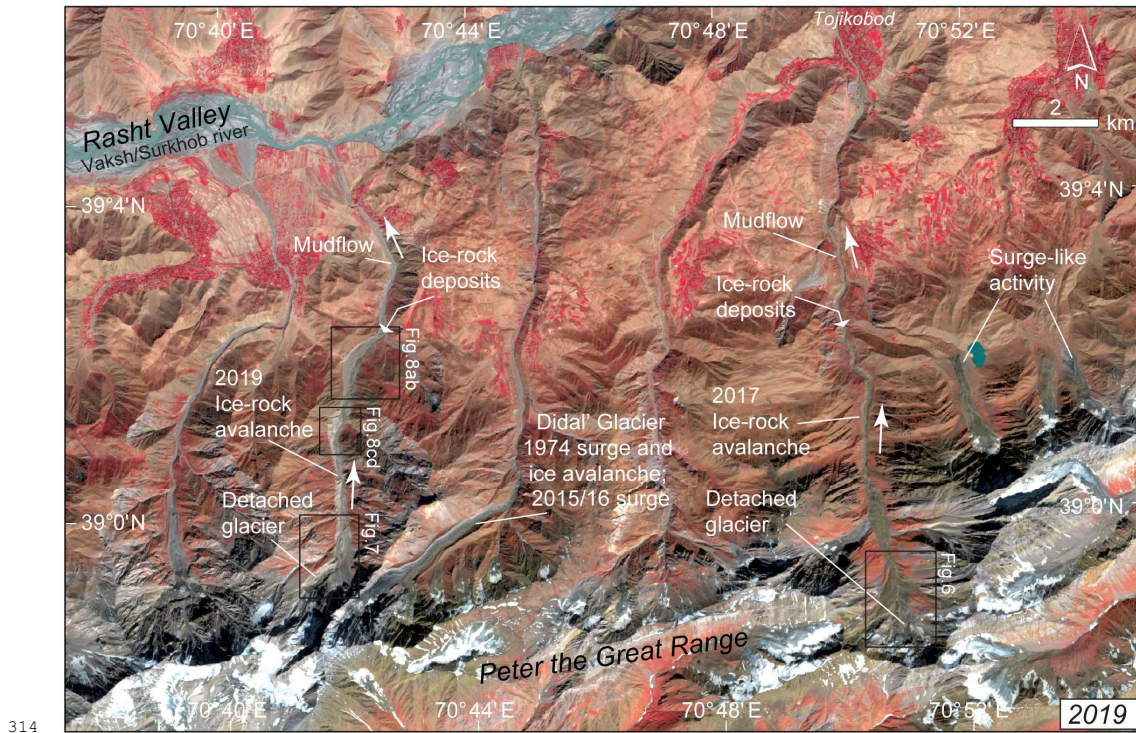

314

316

**Figure 5: Rasht Valley and Peter the Great Range, Tajikistan. Locations of the 2017 and 2019 ice-rock avalanches are indicated. Satellite image: Sentinel-2 (EU Copernicus), 19 Sep 2019.**

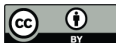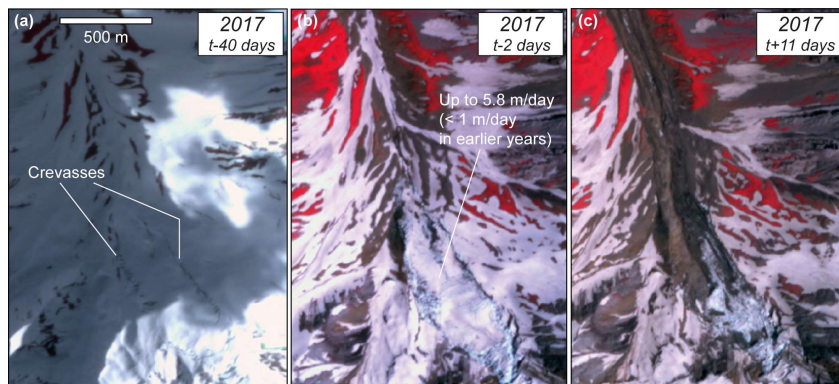

318

320 **Figure 6:** Planet images over the Rasht Valley glacier detachment of around 10 July 2017 (=t). (a) 31 May 2017, (b) 8  
322 July 2017, (c) 21 July 2017. Abnormal marginal crevassing and enhanced speeds were visible several weeks before the  
detachment. See Fig. 5 for location. (Satellite images © Planet).

322

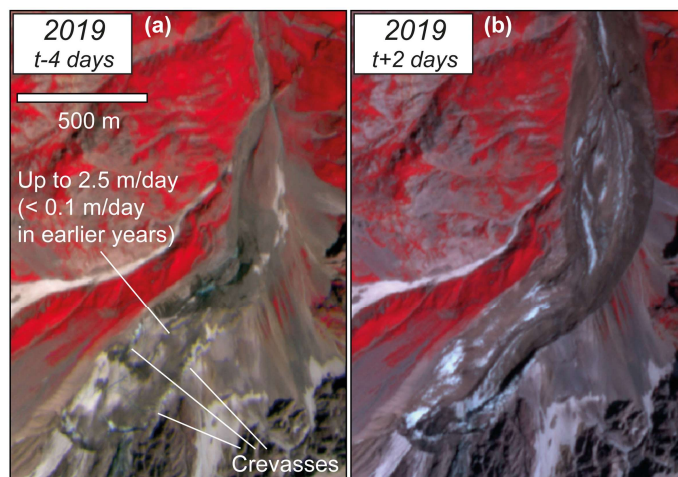

324 **Figure 7:** Planet images over the Rasht Valley glacier detachment of around 2 Aug 2019 (=t). (a) 29 Jul 2019, (b) 4 Aug  
326 2019. See Fig. 5 for location. (Satellite images © Planet).

326

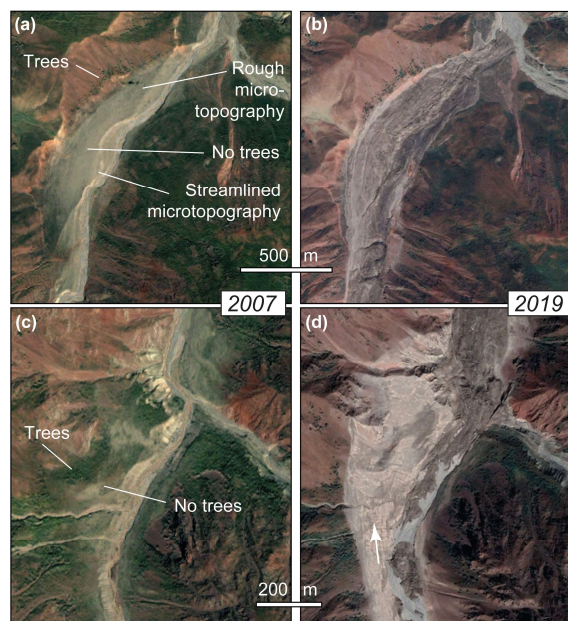

328

330 **Figure 8: Location of the ~2 Aug 2019 Rasht Valley ice-rock avalanche. See Fig. 5 for image location. (a) and (c): 30 Jul 2007 (© Google Earth and Maxar). (b) and (d): 20 Aug 2019 (© Google Earth and CNES/Airbus). Before the 2019 event, traces of a potential former large mass flow were visible (lack of trees in the valley, sparse vegetation, striations).**

332

### 3.3 Aru, 2016, western Tibet

334 On 17 July 2016, a massive volume of glacier ice detached from the lower part of an unnamed glacier in the Aru Range (Rutok  
County, China) in the western Tibetan Plateau (termed Aru-1). The fragmented ice mass ran out 6 km beyond the glacier  
336 terminus, killing nine herders and hundreds of their animals, and reached the Aru Co lake (Tian et al., 2017; Kääh et al., 2018).  
The ice debris covered 8–9 km<sup>2</sup> and a volume of the detached glacier part of 68 10<sup>6</sup> m<sup>3</sup> was calculated. On 21 September 2016,  
338 a second glacier (Aru-2) detached just a few km south of Aru-1 (Fig. 9). Similar to the July event, the glacier ice fragmented  
and transformed into a mass flow. The glacier debris in the second detachment covered 6–7 km<sup>2</sup> with a detached glacier volume  
340 of 83 10<sup>6</sup> m<sup>3</sup>. (Before-after elevation differences are available in Kääh et al. (2018)). The mean speeds of the Aru ice-rock  
avalanches were estimated to 30–50 m s<sup>-1</sup>, with maximum speeds of 70–90 m s<sup>-1</sup> (Kääh et al., 2018). (For a satellite image of  
342 the current situation of the Aru glaciers and the deposits, see the Supplement).





Glaciers in the wider region around the Aru range are part of the Karakoram – West Kulun Shan – Eastern Pamir anomaly (Treichler et al., 2019) and experienced a slight increase in thickness of around 0.20–0.30 m/a water equivalent since the early 2000s (Brun et al., 2017; Kääb et al., 2018). Positive mass-balances of the Aru glaciers (modeled based on ERA-interim reanalysis data; Kääb et al., 2018) and the widespread growth of endorheic lakes confirmed a precipitation increase in the region from the late 1990's on (Treichler et al., 2019). Driven by these positive mass balances, the two Aru glaciers underwent surge-like accelerations and mass transfers over years before the detachments (Gilbert et al., 2018; Kääb et al., 2018). In apparent contrast to the positive mass balances and the surge-like mass transfers, the Aru-1 and Aru-2 glaciers both retreated by around 500 m between 1970 and 2015.

Since at least 2011 and until 2014, the sections above the eventual detachment zones of both Aru glaciers subsided. Simultaneously, glacier sections below bulged upwards. The rates of elevation change derived for 2011–2014 indicate that a down-glacier mass transfer had already begun during the second half of the 2000s (Gilbert et al., 2018). A modelling study based on the observed elevation changes reconstructed changes in basal friction and horizontal velocity prior to the detachments (Gilbert et al., 2018). It showed that the two glaciers were close to their steady state geometry with no/little sliding until 2010. Thereafter, decreasing friction under the whole detachment area of Aru-1 and in more localized zones of Aru-2 started to trigger the surge-like mass transfer. Modelling the glaciers' thermal regimes revealed that the frictional changes likely occurred in temperate areas of the two glaciers and that stress concentration occurred <sup>at</sup> on the cold-ice margins (Gilbert et al., 2018). The surge-like changes of basal friction under the Aru glaciers were thus likely not associated with a change of the glaciers' thermal regimes but rather with a change in friction due to increasing water pressure in the already temperate areas. During the instability development, basal shear stresses in the detachment area dropped by an order of magnitude, leading to significant stress concentrations at the detachment margins and in a few spots under the glaciers. These stress concentrations led to strongly enhanced crevassing at the glacier margins and the zone of the later <sup>scarp</sup> ~~scarp~~ head several months prior to the Aru-1 detachments. Fast-developing crevasses appeared only three weeks before the Aru-2 detachment and were discovered in satellite images in time to alert Chinese authorities.

The Aru glaciers are surrounded by continuous permafrost of -3 to -4 °C mean annual ground temperature (Obu et al., 2019). Field observations in the detachment and runout zones showed no presence of a hard-bed lithology beneath the glaciers, and no large boulders were observed anywhere in the runout paths. Rather, extensive deposits of soft, unconsolidated and fine-grained lithologies were identified. The Aru glaciers, situated in a region of positive or zero mass balances (Brun et al., 2017; Treichler et al., 2019) could well build up again to a size similar to the one before their 2016 collapses. Especially in the path of the Aru-1 avalanche, streamlined striations, not present before the event, are well visible at several locations in high-resolution satellite data (not shown).

*L) does this mean there is no evidence of a similar event in the more recent past?*

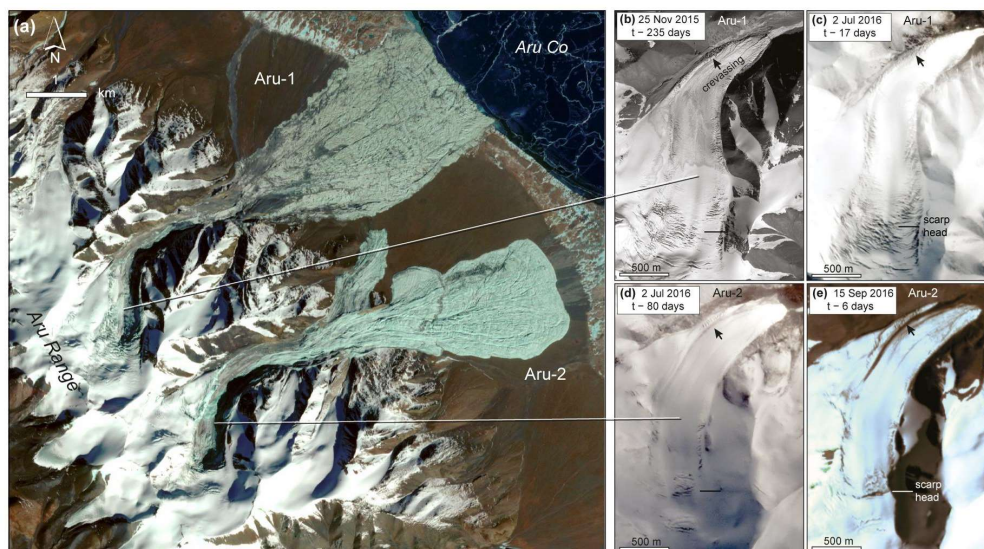

374 **Figure 9:** Satellite images of the Aru glaciers, western Tibet, and their detachments. (a) Planet infra-red false-colour  
376 satellite image of 29 November 2016, after both glaciers collapsed (© Planet). (b) Enhanced crevassing on Aru-1 glacier  
378 (SPOT7, © Airbus). Time  $t$  refers to detachment date (17 July 2016 for Aru-1, 21 September 2016 for Aru-2). Note the  
particular crevassing at the northern curve of the glacier. (c), Aru-1 (Planet). (d), Aru-2 (SPOT7, © Airbus). (e), Aru-  
2 (© Planet), six days before collapse. The horizontal line in panels (b-e) indicates the scarp head positions of the later  
detachments.

380

### 3.4 Amney Machen, 2004, 2007, 2016, and 2019, eastern Tibet

382 A sequence of surge-like advances, some of them ending in detachments of the glacier tongue, have been observed for a glacier  
in the Amney Machen mountain range, Eastern Tibet (Fig. 10, Tab. 1; Paul, 2019). The isolated mountain range is home to  
384 several surging glaciers (Wenying, 1983). The first ice-rock avalanche happened between 26 January and 3 February 2004,  
and the involved volume was estimated to be 20-25  $10^6$  m<sup>3</sup>, perhaps up to 36  $10^6$  m<sup>3</sup> according to a local information sign-  
386 board (Paul, 2019). Three years later, between 23 September and 2 November 2007, a second detachment followed a surge-  
like advance, or surge-like recovery, of the glacier tongue that had detached in 2004. The 2007 detachment was considerably  
388 smaller in volume than the one in 2004. A third detachment, also smaller than the 2004 one, occurred between 4 and 7 October  
2016 (date from Planet images). Following this event, the glacier tongue started to recover again, and another small avalanche  
390 occurred from it between 9 and 20 July 2019. Paul (2019) notes the weak rocks and fine sediments visible in the rock ribs in

?  
↓  
which one, advance or recovery?



the glacier's steep source area. The glacier recovered rapidly after each detachment, suggesting that it is largely nourished by  
392 ice and rock fall from the headwall, and that a rock/ice melange likely makes up the glacier tongue. The surface slope of the  
detaching lower part of the glacier is around 15°. The glacier lies in an area of continuous permafrost with ground temperatures  
394 in the order of -3 to -6°C (Obu et al., 2019). Streamlined striations in the avalanche path are visible in high-resolution satellite  
images (not shown).

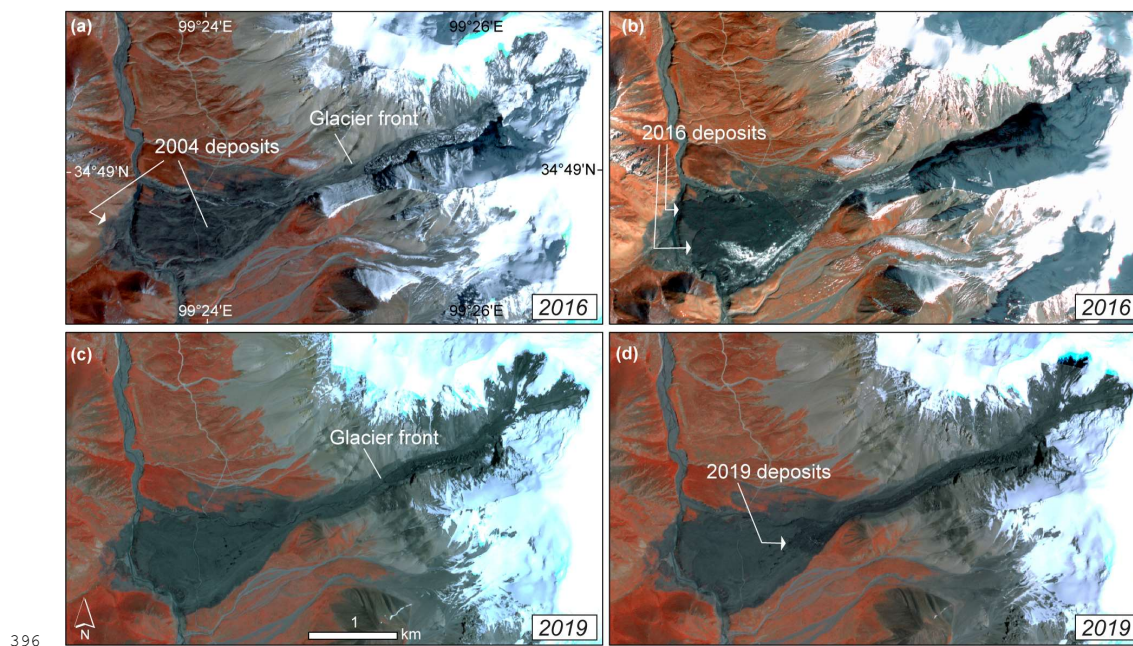

396  
398 **Figure 10: Unnamed glacier in the Amney Machen range, Tibet. Satellite images of (a) 2 Oct 2016, (b) 23 Oct 2016, (c)**  
**9 Jul 2019, and (d) 25 Jul 2019. Detachments of the glacier tongue happened before (a), between (a) and (b), and between**  
**(c) and (d). (Satellite images © Planet).**

400

### 3.5 Sedongpu/Gyala, 2018, south-eastern Tibet

402 During 2017 and 2018 the Sendongpu basin below the western flank of the Gyala Peri peak (7294 m.a.s.l.; Fig. 11) in south-  
eastern Tibet was the source of a series of large mass flows. Some of them dammed the Yarlung Tsangpo river, which posed  
404 a serious flood hazard to the upstream Gyalha village and large downstream areas, and triggered hazard management and



investigations of the causes (Tong et al., 2018; Liu et al., 2019; Chen et al., 2020). The largest of the mass flows stemmed  
406 from the detachment of a large, low-angle glacier in 2018.

### 3.5.1 Events before 2018

408 In order to elucidate significant elements of the recent mass-flow history from the basin that might have conditioned the 2018  
detachment and that are not documented in detail elsewhere, we start our description with the oldest satellite data available to  
410 us. In Corona satellite reconnaissance data of 8 Dec 1969, a narrowing in the Yarlung Tsangpo river where the Sendongpu  
valley joins the river, points to deposits from previous mass flows. However, trees on these deposits suggest no recent large  
412 mass flow activity. The main glacier in the basin, here called Sedongpu Glacier (Fig. 11), shows some signs of enhanced flow  
such as large crevasses. On Corona satellite data of 6 Nov 1974 the glacier has advanced some 800 m into steeper terrain.  
414 Fresh traces of a large mass flow are visible between the glacier front and the main Yarlung Tsangpo river, and fresh deposits  
seem to have covered or destroyed the forest on the older deposits in the river, but the main glacier is still in place. The glacier  
416 showed one single tongue in 1969, but had split into two tongues during its advance by 1974, a feature that it still exhibited in  
2016. Chen et al. (2020) describe an ice avalanche from the Sedongpu basin that dammed the Yarlung Tsangpo river in 1968,  
418 but do not mention any other events before 2014. From our interpretation of the Corona satellite data there was either one more  
event(s) between 1969 and 1974, or the '1968' event actually happened a few years later. The next large mass flow (listed as  
420 ice avalanche in Chen et al. (2020) and debris flow in Tong et al. (2018); we interpret at least a large debris content) happened  
in 2014. The source of the mass flow must have been in the upper part of the main Sedongpu Glacier or its headwall, as both  
422 lateral moraines of the glacier were heavily eroded from the glacier side (RapidEye satellite data of 2013–2015). The glacier  
surface was not visibly changed along the glacier centre line, suggesting that the mass flow must have flowed along both  
424 glacier margins. Although difficult to determine in the satellite data available to us, the flow may have eroded the lowermost  
part of the glacier tongue.

426 Between 20 and 27 Oct 2017 (Planet and Sentinel-2 images) a huge rock avalanche started high up from the north ridge of  
Gyala Peri and ran over large parts of the Sedongpu basin and down to Yarlung Tsangpo, damming the river (Figs. 11 and 12).  
428 The event seems to have had a severe impact on Sedongpu Glacier. We generated two elevation models from 13 Nov 2015  
Spot6 and 30 Dec 2018 Pleiades tri-stereo data that produced robust results despite the extreme topographic conditions.  
430 Differencing the two DEMs indicates that the October 2017 rock avalanche removed around 17 and 33  $10^6$  m<sup>3</sup> of material  
from two close-by but separated areas, respectively (Fig. 11c). If both failures happened as part of the same event, the total  
432 volume of 50  $10^6$  m<sup>3</sup> makes this one of the larger rock avalanches detected in recent decades. Based on visual inspection of  
satellite data, we consider it very likely that the avalanche also involved small glaciers from the west wall of Gyala Peri and  
434 incorporated ice from the surface of the glaciers lower down, as it ran over them. The Chinese seismic database registered two  
large 'landslide' events on 22 Oct 2017: A M3.2 event at 6:20 about 16 km west of Sedongpu and a M4.0 event at 6:22 directly  
436 at Sedongpu. Chen et al. (2020) and Tong et al. (2018) confirm that at least the latter signal stems from the Gyala Peri rock-



ice avalanche. Subsequent satellite images suggest that the avalanche must have changed the surface of Sedongpu Glacier  
438 drastically. It covered the glacier and much of the basin with debris and dust. A small, surge-like lobe with ponds on it appeared  
at the transition between the headwall and the tongue of Sedongpu Glacier (Fig. 12, and GoogleEarth, BingMaps). The eastern  
440 tributary glacier to Sedongpu Glacier also showed a surge-like lobe (Sentinel-2, Planet, GoogleEarth). Driven by the  
geomorphological changes in the basin, a series of debris flows, some involving ice and likely nourished from the large  
442 amounts of unconsolidated debris left behind by the rock-ice avalanche, occurred after 22 Oct 2017 and into 2018 (Tong et al.,  
2018; Chen et al., 2020). The two 18 Nov 2017 M5.2 and M6.9 Linzhi/Milin/Nyingchi earthquakes, with epicentres only a  
444 few km from Sedongpu, may have contributed to triggering of the debris flows (Hu et al., 2019). Lastly, we report hundreds  
of small earthquakes recorded under the Gyala Peri massif in 2017 and 2018, most up to M2, some up to M3, which we have  
446 not analysed further in the present study (Chinese Earthquake Data Center, 2020).

### 3.5.2 Detachment in 2018

448 Following the 2017 rock-ice avalanche the main Sedongpu Glacier underwent drastic changes (Fig. 12). Ponds developed on  
its surface and along the margins. Surface velocities increased from a background velocity of  $\sim 0.3$  m/d (ca. 100 m/a) in 2017  
450 to 1–3 m/d end of January 2018, 10 m/d in mid-September 2018, and 25 m/d in mid-October 2018 (velocities derived from  
offset tracking in repeat Planet, Sentinel-1, and Sentinel-2 data). The glacier surface showed several crevassed bulges (Fig.  
452 12b) in January 2018, and progressively more crevasses appeared as the glacier tongue expanded (Fig. 12c). The lower, flat  
glacier part separated from the steep head wall. Between 19 Sep 2018 (last optical image due to later cloud cover) and 13 Oct  
454 2018 (Sentinel-1) the glacier advanced by almost 1 km. On 17 or 18 October (Tong et al., 2018; Chen et al., 2020), the entire  
tongue of Sedongpu Glacier detached over a length of about 3.5 km (glacier width between 250 and 550 m) (Figs. 11 and 12).  
456 Planet images of 27 Oct 2018 and Chinese media images confirm that large amounts of ice blocked the Yarlung Tsangpo river  
(Fig. 11d). Parts of the emptied glacier bed filled up with enough ice debris that another mass flow originated from there on  
458 29 Oct 2018. The dam in the Yarlung Tsangpo river was estimated to be roughly  $40\text{--}60 \times 10^6 \text{ m}^3$  in volume (Chen et al., 2020).  
Differencing our 2015 SPOT6 and 30 Dec 2018 Pleiades tri-stereo DEMs (Fig. 12d) shows two areas of distinct volume loss:  
460 around  $80 \times 10^6 \text{ m}^3$  are missing from the main branch of the glacier, and around  $50 \times 10^6 \text{ m}^3$  from its terminus and frontal moraine.  
An ASTER satellite stereo DEM of 11 Nov 2017 suggests that the volume loss over the glacier tongue and frontal moraine  
462 cannot have occurred before November 2017. From our data we cannot tell how much of the total  $130 \times 10^6 \text{ m}^3$  stems from the  
main first glacier detachment event of 17/18 Oct 2018, and how much from the 29 Oct 2018 event. However, satellite images  
464 indicate that the first event involved by far the largest volume. The detached glacier part had an overall slope of only  $8\text{--}9^\circ$ .  
According to Obu et al. (2019) it should have been several hundred meters below the regional permafrost limit, but cold or  
466 polythermal ice is certainly found in the west wall of Gyala Peri, and could theoretically be advected into the basal parts of the  
glacier near its tongue.



468 Between 19 Sep and 26 Oct 2018 (Planet) a  $\sim 9 \cdot 10^6 \text{ m}^3$  rock(-ice) avalanche (volume from 2015 SPOT6 and 2018 Pleiades tri-  
469 stereo DEM difference) originated from the south-western flank of Gyala Peri and likely reached Sedongpu Glacier (Fig. 11).  
470 The avalanche covered a small glacier below its starting zone which started a surge-like advance early 2018. Due to insufficient  
471 satellite data (cloud cover in optical data; low resolution and radar shadow in SAR data), though, we cannot tell if this avalanche  
472 happened before, during or after the 17/18 Oct 2018 glacier detachment, and could thus have triggered the glacier detachment.  
473 Seismic records are also inconclusive regarding the rock avalanche and the glacier detachment, with two dozens of M1–2  
474 earthquakes recorded under the Gyala Peri massif between mid September and end of October 2018.

From all the evidence collected above, it seems very likely that the 22 Oct 2017 Gyala Peri rock avalanche, which travelled  
476 over the Sedongpu Glacier, primed the glacier for its detachment a year later, perhaps with additional influence of the 18 Nov  
477 2017 earthquakes, though the exact controlling mechanisms remain unclear. The effects that the ongoing mass-wasting  
478 activities from Gyala Peri had on Sedongpu Glacier<sup>s</sup> can have been manifold: additional loading on the glacier can have  
479 increased normal and shear stresses, and the 2017 rock avalanche and earthquakes could have mechanically weakened the  
480 glacier and its bed, potentially disrupting the subglacial drainage system. The large amounts of fine dust deposited on the  
481 glacier will likely have changed (enhanced?) its surface melt rates. Lastly, independent factors <sup>such as</sup> ~~like~~ high temperatures and  
482 precipitation amounts (Tong et al., 2018; Liu et al., 2019), associated with large water input into the glacier, could have  
483 complicated the changes caused by rock-avalanche impact. The supraglacial and glacier-marginal ponds, unusual on temperate  
484 glaciers (see Haeberli et al. 2002, Kääb et al. 2004), suggest that the glacier was under high internal water pressure. The bulging  
485 ice and the strong downstream gradient in surface velocities suggest that a surge-like instability first developed in the upper  
486 section of the low-angle part of the glacier. Just how this instability propagated down-glacier, whether by exerting pressure on  
487 the lower glacier from above, or by a propagation of exceptionally low basal friction values (Thogersen et al., 2019) remains  
488 unclear. High-resolution imagery and media photos of the glacier bed and detachment deposits, as well as the various debris  
489 flows that originated from the basin, suggest that the detached glacier rested on a soft bed with substantial amounts of fine  
490 material. The geology of the area is described as marble (Liu et al., 2019), which at least opens up the possibility of fine-  
grained sediments.

492 It remains to be seen to which extent the Sedongpu Glacier is able to rebuild, given the strongly negative mass balances in the  
region (Kääb et al., 2015; Brun et al., 2017; Treichler et al., 2019; Shean et al., 2020).

### 494 3.5.3 Zelunglung Glacier surge-like instabilities

The region around Sedongpu does not seem to host any obvious surge-type glaciers. However, the events at Zelunglung Glacier  
496 (29.62° N, 95.00° E; GLIMS G095018E29637N, RGI60-13.01428), 20 km south of Sedongpu, are worth mentioning. In 1950,  
1968, and 1984 extraordinary instabilities propelled the glacier forward and blocked the Yarlung Tsangpo river (Zhang, 1992).  
498 The 1984 event seems to have involved only a smaller section of the glacier. Corona reconnaissance satellite images of 1969  
show a massive advance (by about 4.5 km compared to 2018), but no detached glacier. However, the glacier had obviously



500 overridden its frontal moraine, reaching almost down to Yarlung Tsangpo. Deposits, visually similar to those of ice-rock  
502 avalanches in general cover much of the main Yarlung Tsangpo river bed on a length of about 2.5 km downstream measured  
from the confluence with the Zelunglung valley. Glacier advance rates of up to 1 km/h (!) are reported for the 1950 event  
(Zhang, 1992). Such rates are far above what is typical for surges and the glacier might have, at least in 1950, undergone an  
504 event close to a sudden detachment in the sense of the present contribution.

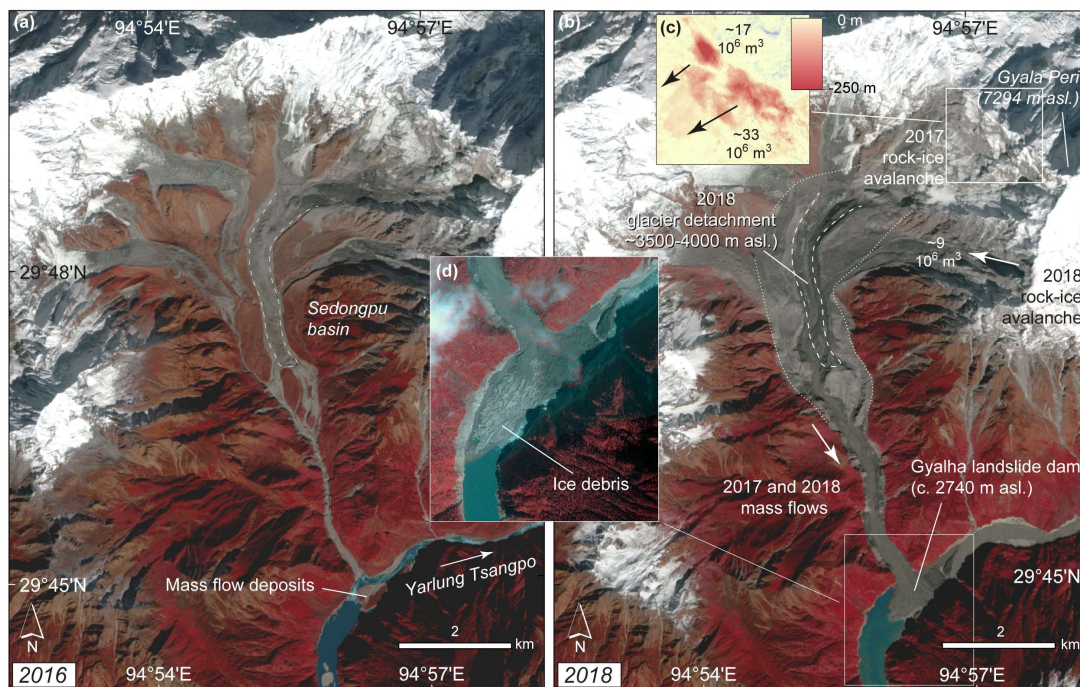

506 **Figure 11:** Location of the 17/18 Oct 2018 Sedongpu glacier detachment, south-eastern Tibet. (a) Sentinel-2 (EU  
508 Copernicus) image of 20 Nov 2016, before a series of mass flows happened that culminated in glacier detachment.  
Already earlier, mass flows from the basin have blocked the Yarlung Tsangpo river. (b) Sentinel-2 image of 31 Oct  
510 2018 showing the area impacted by the 22 Oct 2017 rock avalanche from the Gyala Peri peak, and the 17/18 Oct 2018  
glacier detachment. (c) Detail of elevation model differences between SPOT6 13 Nov 2015 and Pleiades 30 Dec 2018 tri-  
512 stereo data. Elevation losses amount up to 330 m, but the colour scale is saturated at -250 m. (d) Detail of the glacier  
detachment deposits in the main river (© Planet; image of 27 Oct 2018, 10 days after detachment).

514

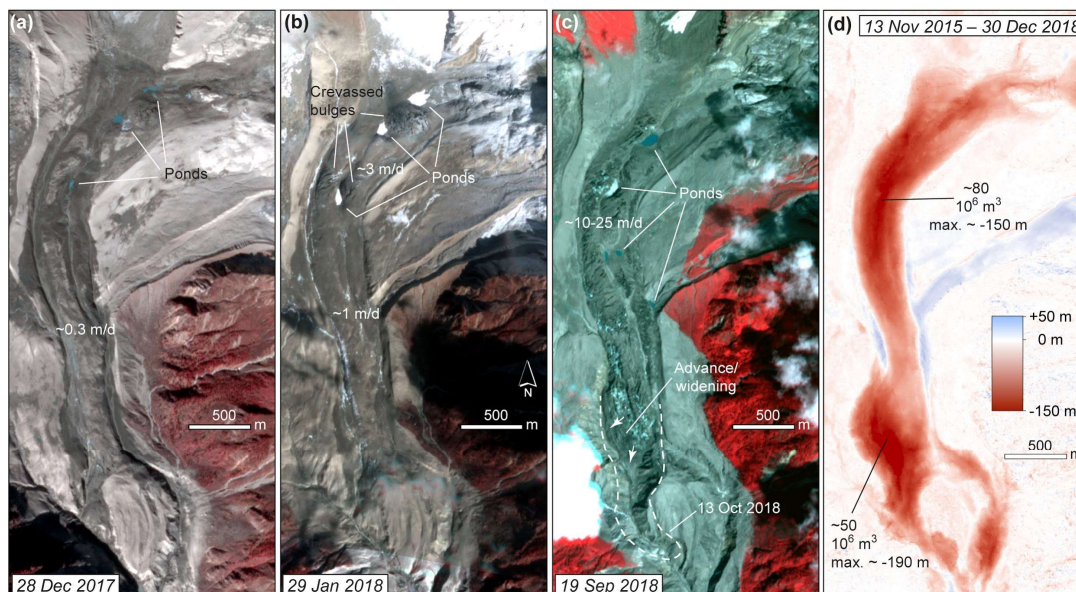

516

518

520

**Figure 12: (a)–(c) Evolution of Sedongpu Glacier towards instability and detachment. Average surface velocities around the image dates are indicated. (Satellite images © Planet). Velocities and glacier position after 19 Sep 2018 (25 m/d) are derived from Sentinel-1 radar images. (d) Detail of elevation model differences between SPOT6 13 Nov 2015 and Pleiades 30 Dec 2018 tri-stereo data. Elevation losses amount up to 190 m, but the colour scale is saturated at -150 m.**

### 522 3.6 Flat Creek, 2013, 2015 and 2016, Alaska

524 Flat Creek glacier, a small glacier in the north-eastern corner of Alaska's St. Elias mountains (Fig. 13), produced two large glacier detachments in 2013 and 2015. This region in Alaska is home to many surging glaciers (e.g., Harrison et al., 2015; Sevestre and Benn, 2015; Kochtitzky et al., 2019), and a glacier in a valley adjacent to Flat Creek surged between 2012 and 2016. Located in the rain shadow of the St. Elias range, the area receives on average about 350 mm of precipitation annually (2008 – 2018). A mean annual air temperature of -14°C at the former terminus of Flat Creek glacier, ground temperature measurements, and electrical resistivity tomography surveys strongly suggest that the headwall is underlain by continuous permafrost (Jacquemart et al., 2020).

530 On 5 August 2013, the lower 500 m of the glacier detached, releasing 6.8-11.2  $10^6$  m<sup>3</sup> of ice and lithic material. On 31 July 2015, most of the remaining glacier ice (up to the drainage divide) detached, evacuating an additional 17.6-20.1  $10^6$  m<sup>3</sup> (Jacquemart et al., 2020). Both events produced runouts of over 11 km (angle of reach 6-7°), deposited vast amounts of lithic





534 material, and buried several km<sup>2</sup> of old growth forest (400+ years old). The large amount of fine-grained sediment found in  
the deposits suggests that the failures occurred within the glacier bed rather than at the ice-bed interface. The detachment slope  
was determined to be 21°.

536 A remarkable feature of Flat Creek glacier was a ~70 m tall bulge upstream of a stagnant, crevasse-free tongue. A similar  
bulge on Trapridge glacier, a polythermal surge-type glacier 80 km south-east of Flat Creek, was shown to have formed because  
538 a cold-ice tongue buttressed temperate ice upstream (Clarke and Blake, 1991). Based on the low annual air temperature and  
the presence of continuous permafrost, Jacquemart et al. (2020) concluded that the bulge on Flat Creek glacier was also the  
540 consequence of a polythermal regime. Measurements of the bulge position in satellite images suggest that the bulge advanced  
between 2011 and 2013, likely increasing driving stresses locally.

542 The 2013 and 2015 detachments both occurred at the peak of their respective melt seasons. Using a degree-day model,  
Jacquemart et al. (2020) found that the water availability during the exceptionally warm summer of 2013 was primarily melt  
544 driven and up to 4.8 standard deviations ( $\sigma$ ) above the long term mean (1979–2015). No detachments were detected in 2014,  
when water availability was below average ( $-0.5 \sigma$ ). Water availability was again higher in 2015 ( $+ 1 \sigma$ ), when the second  
546 detachment occurred.

In 2016, a third glacier detachment released from a much steeper glacier (~30°) in the same cirque (not described in Jacquemart  
548 et al. (2020) but mentioned in Jacquemart and Loso (2019)). We differenced a 13 March 2016 Arctic DEM and a structure-  
from-motion DEM from a 2019 aerial survey and estimate the volume of this detachment to be  $4.7 \pm 0.18 \cdot 10^6 \text{ m}^3$ . Its causes  
550 have not been investigated, but the moving mass of ice was caught on video by rangers on a coincidental overflight. The speed  
of the observed mass flow was about three times slower than that of the 2013 and 2015 events. Nevertheless, the churning  
552 mass of ice blocks (termed a “slush-alanche” by Jacquemart and Loso (2019)) provides a sense of what the much larger flows  
may have looked like.

554

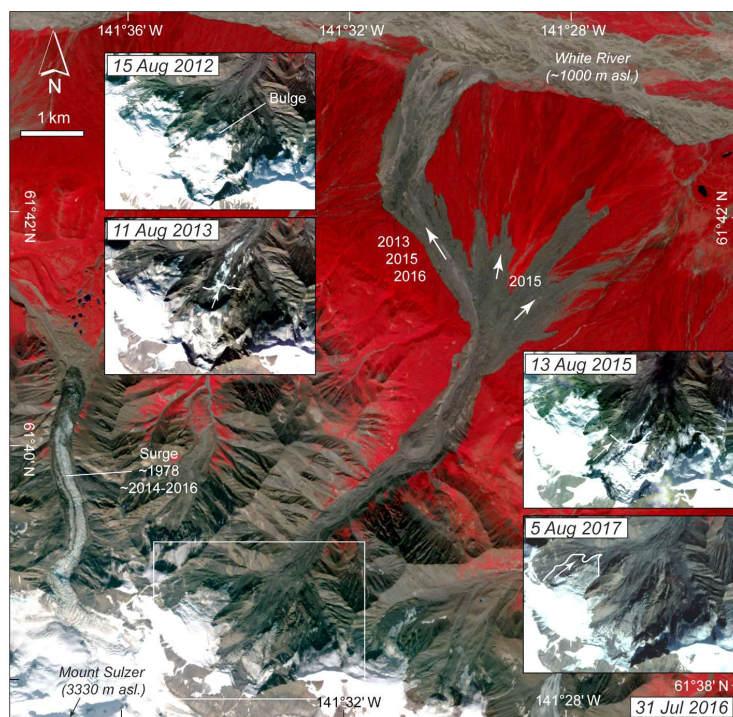

556 **Figure 13: Overview of the three detachments and ice-rock avalanches from Flat Creek Glacier, Alaska, since 2012.**  
557 **On the 15 Aug 2012 inset, a bulge is visible on the lower part of the glacier. On the 11 Aug 2013 inset, the glacier part**  
558 **that detached on 5 Aug 2013 is indicated together with the front position before the event (white line). On the 13 Aug**  
559 **2015 inset, the detachment of 31 Jul 2015 and the front position before it are indicated. On the 5 Aug 2017 inset, the**  
560 **area of the 10 Aug 2016 detachment is shown. All images © Planet (Dove and RapidEye satellites). (For more images**  
561 **and front positions see Jacquemart et al. (2020)).**

562

### 3.7 Aparejo, 1980, Chilean Andes

564 On 1 March 1980,  $7 \cdot 10^6 \text{ m}^3$  (85% of its total volume) sheared off the debris-covered Aparejo Glacier in the Chilean Andes,  
mobilizing the detached mass 3.7 km down-valley with an estimated speed of 110 km/h (Ugalde et al., 2015; Ugalde, 2016;  
566 Ugalde et al., 2017) (Fig. 14). The slide deposit covered an area of  $0.55 \text{ km}^2$  with ice and rock debris piled up to 17 m thick.  
The volume of the deposit was estimated at  $8.1 \cdot 10^6 \text{ m}^3$  (Marangunic, 1980). Five mountaineers witnessed the event and noted



568 several supraglacial ponds and 2-3 cm of wet snow on the surface of the glacier (Marangunic, 1980). These observations  
569 suggest that the triggering mechanism of the glacier detachment likely involved an extreme reduction of the basal drag due to  
570 high water saturation of the glacier bed. Aparejo glacier appears to sit on a glacier bed composed primarily of weak subglacial  
571 till, and the slope on the lower two thirds of the glacier averages 7°. Snowmelt infiltration and warm precipitation due to a  
572 sudden increase of the zero-degree isotherm elevation could have provided the main source of infiltrated water, leading to  
573 enhanced water pressure at the glacier bed. During a field inspection on 12 March 1980, Marangunic (1980) found that the  
574 nearby debris-covered glacier to the east, glacier no 51 according to the Chilean glacier inventory at the time (Fig. 14), also  
575 showed significant signs of surge-like instability, such as a heavily crevassed front and patches of freshly exposed ice along  
576 its entire length. The prominent terminal moraine of this glacier may have contained its detachment, though.

The Aparejo glacier is situated in a region of complex geology with a number of weak rock formations, including sandstones  
578 and fine-grained conglomerate in the immediate vicinity of the glacier (Ugalde, 2016). Ugalde (2016) sampled the grain size  
579 distribution of the remains of the lower ice-rock avalanche deposits and did not find them to contain more fines than a typical  
580 moraine, but notes that spatial variability was high and that the 35 years since the detachment may have depleted the deposits  
581 of fine particles. In the former avalanche path, modern satellite images show streamlined striations similar to those reported  
582 from several other detachments in this contribution. Remarkably, similar striations are also visible in Hycon airphotos from  
583 1956. Interestingly, the geomorphology of the deposit area is similar between the 1956 airphotos and the post 1980-event high-  
584 resolution satellite images. One possible interpretation of this is that large mass flows had already originated from the Aparejo  
585 cirque at earlier times. A detailed field investigation would be required to determine whether the striations consist of glacial  
586 flutes formed under a previous glacier extent or stem from a catastrophic detachment.

In 2015, the glacier had around 15% of its pre-detachment volume, covering much of the original area, and with a surface  
588 slope of around 20° (Ugalde, 2016). The current glacier terminus lies at around 3400 m a.s.l., slightly below the lower regional  
589 limit of discontinuous permafrost, estimated by Brenning (2005) to be at around 3500 m a.s.l. Consistent with regional glacier  
590 mass balance trends (Falaschi et al., 2018b; Braun et al., 2019; Dussailant et al., 2019), decreasing ice thicknesses have been  
591 identified on the lower and middle section of the Aparejo glacier (Ugalde et al., 2017), pointing to the glacier shrinking under  
592 current climate conditions.

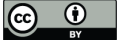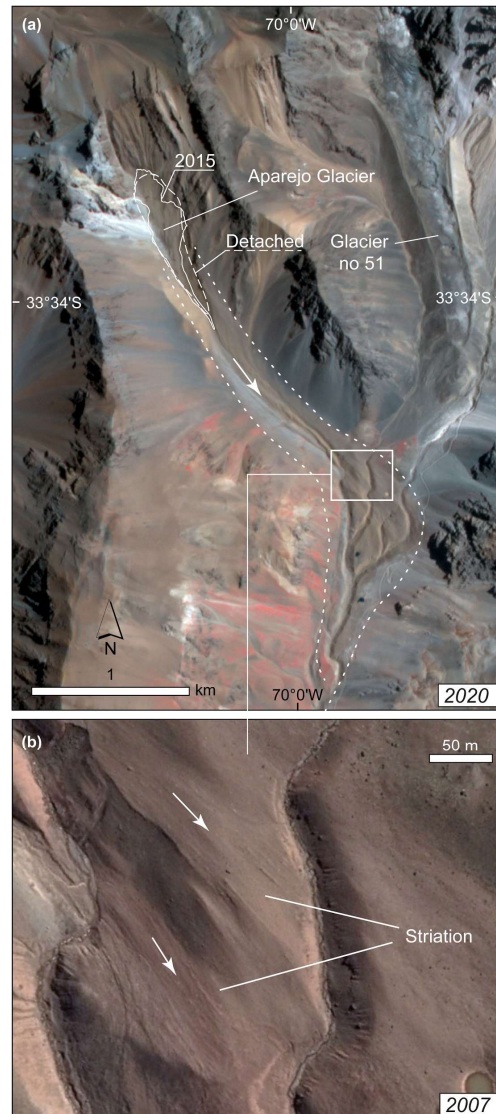

594 **Figure 14: Aparejo Glacier, Chilean Andes. (a)** Satellite image (© Planet) of 27 Jan 2020 with the outlines of the  
596 **detached glacier as solid line, and the outlines of the 1980 detachment and runout roughly indicated as dashed lines**  
**(outlines after Marangunic, 1980; Ugalde, 2016; Ugalde et al., 2017). (b) Detail of avalanche path (rectangle in (a)) with**  
**streamlined ground striations. Satellite image: © Google Earth and CNES/Airbus, 29 Feb 2016.**



598

### 3.8 Leñas, 2007, Argentinean Andes

600 The  $4 \times 10^6 \text{ m}^3$  detachment of Leñas Glacier between 5 and 14 March 2007 was discovered only recently, since it happened in  
a very remote region and had no down-stream impacts. Meanwhile, the case is described in detail by Falaschi et al. (2019).  
602 The detached lower glacier section had a surface slope of around  $15\text{-}16^\circ$ . The glacier tongue at around 3450 m a.s.l. is suggested  
to lie within the zone of discontinuous permafrost in the region. The bed characteristics of the glacier are not known, but large  
604 amounts of fine sediments were found over the run-out area of the event. A number of glacier surges are documented in the  
wider region but not for Leñas Glacier itself (Falaschi et al., 2018a, 2019). At the location of the later head scarp of the  
606 detachment, pronounced transverse crevasses are visible in airphotos from 1970 and in a satellite image from a few weeks  
before the event (SPOT5). It is hard to determine, however, if these crevasses could have been signs of abnormal glacier  
608 behaviour, or rather a pre-existing feature that then naturally formed the upper failure scarp. Transverse undulations of the  
glacier surface as indicated in the 2000 SRTM DEM, and a slight increase of surface gradients at the location of the crevasse  
610 zone favour the latter scenario.

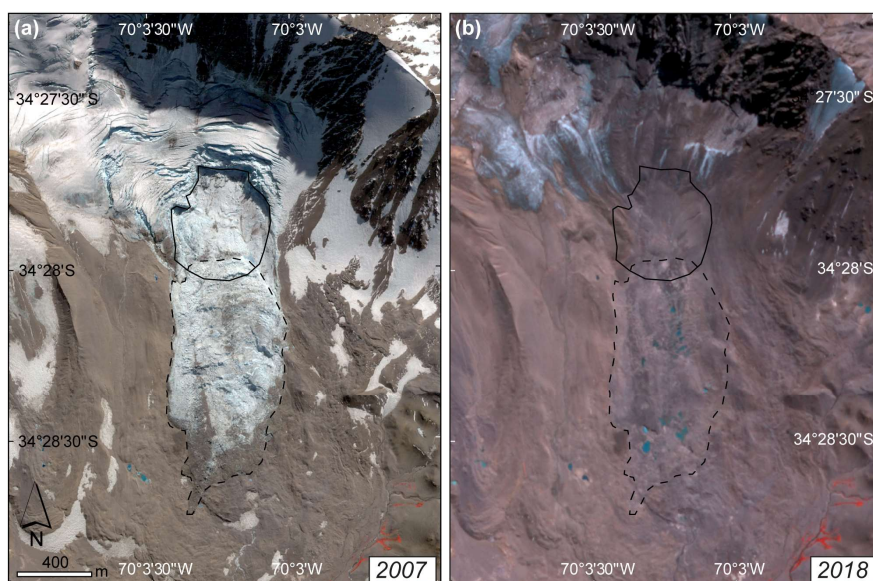

612 **Figure 15: (a) Quickbird satellite image of 19 Apr 2007 over Leñas Glacier, Argentinian Andes, a few days after**  
614 **detachment (© Maxar). (b) Planet image of 28 Mar 2018. Bold lines in both panels indicate the detached glacier part,**  
**dashed lines the outlines of the avalanche deposits. (© Planet).**



### 616 3.9 Tinguiririca, 1994 and 2007, Chilean Andes

#### 618 3.9.1 The 1994, 2007 and a possible 1962 event

618 A detachment from a glacier on the southern flank of the Tinguiririca Volcano (Fig. 16) happened between 27 June (Landsat  
5 TM) and 6 July 1994 (Landsat 5 TM). For the event, we estimate a detached glacier area of  $0.2 \text{ km}^2$ . Using glacier thickness  
620 estimates derived for the 2007 case (described below), we estimate a detachment volume of roughly  $4\text{--}5 \cdot 10^6 \text{ m}^3$ . The climatic  
conditions between 1994 and 2007 were obviously favourable enough (i.e. little negative or even balanced regional glacier  
622 mass balances; Masiokas et al, 2016; Dussailant et al. 2019) for the glacier to recover to its pre-detachment geometry.

At the same location, a glacier area of  $0.46 \text{ km}^2$  detached between 7 January (Landsat ETM+ image without collapse) and 14  
624 January 2007 (Landsat ETM+ with collapse), producing an ice/debris avalanche of  $10\text{--}14 \cdot 10^6 \text{ m}^3$  volume (Schneider et al.,  
2011; Iribarren Anacona et al., 2015; Figs. 16, 17). We estimate that the detached glacier had a surface slope of around  $20^\circ$ .  
626 Before the 2007 detachment, the glacier's lowest elevation was at about 3500 m a.s.l., roughly at the lower regional limit of  
discontinuous permafrost (Brenning, 2005). The volcanic nature of Tinguiririca should be associated with weak rocks and  
628 sediments. There are fumarolic fields and hot springs within a few km of the detached glacier (Pavez et al., 2016), and an  
inactive volcanic crater lies just a few hundred metres to the west of the detached glacier. In very high-resolution satellite  
630 images of 2007 and later (GoogleEarth, BingMaps), clear signs of hydrologic activity are visible in the upper part of the  
detachment area: freshly eroded channels, wet looking areas, and deposits from small debris flows – all perhaps signs of  
632 geothermally-enhanced melt of snow and ice (Fig. 17). In the path of the ice-rock avalanche we find streamlined striations  
similar to those found in the Kolka, Rasht 2019, and Aparejo avalanche paths (Fig. 17). As of late 2019, the glacier has not  
634 recovered from its 2007 detachment and there are only a few small snow (or ice?) fields visible at its location. Elevation  
differences between 2000 (SRTM DEM, before detachment), 2007–2010 (ALOS PRISM, after detachment), and 2010–2015  
636 (TanDEM-X; both the ALOS PRISM and TanDEM-X DEMs are multi-year composites and therefore their date range is given)  
suggest that the detached glacier had average and maximum thickness of 21–28 m and 50 m, respectively. Combined with the  
638 detached glacier area of about  $0.5 \text{ km}^2$  we estimate a detachment volume of roughly  $10.5\text{--}14 \cdot 10^6 \text{ m}^3$ , which is in good  
agreement with Iribarren Anacona et al. (2015). The Tinguiririca case illustrates how glacier removal by the 1994 detachment  
640 was largely reversible as the glacier built up again to failure conditions under the climate at that time, whereas the 2007 glacier  
removal seems irreversible under current climate and associated negative glacier mass balances in the region (Falaschi et al.,  
642 2018b; Braun et al., 2019; Dussailant et al., 2019).

In airphotos from 1962 and Corona-series reconnaissance-satellite images from 1967 we notice striations in the valley similar  
644 to the ones visible after the 1994 and 2007 events, and other cases described in this contribution. Over the glacier, the 1962  
airphotos clearly show that a glacier detachment similar to the 1994 event must have occurred not long (weeks, months or a



646 few years?) before the image was taken. Stripes of debris or ice remains after the avalanche are still well preserved in the 1962  
images over the glacier (Fig. 17d). (The associated terrain sections are under snow cover in the 1967 Corona images).

### 648 **3.9.2 A potential large pre-1970s detachment of the neighbouring glacier**

In the neighbouring valley to the east (Fig. 18) we note geomorphological traces that could be investigated further with regard  
650 to their origin from volcanic mass movements, earlier glacier stages, glacier surging, or more glacier-detachment like events.  
In the lower part of this potential event path we find striations, similar to the ones from the Tinguiririca, Aparejo and other  
652 avalanches of this study, largely unchanged since the first available Corona-series reconnaissance-satellite images in 1967  
(Fig. 18c), and airphotos from 1962. Only detailed field work would be able to rule out the possibility that this striations consist  
654 of glacial flutes or small lateral moraines formed during a previous glacier extent, or were produced by a glacier surge. It  
should also be investigated whether such striations can remain largely intact after having been overrun by an ice-rock avalanche  
656 or if it is an indicator of the most recent event (see also Aparejo, where similar questions turned up).

In the upper part of this valley, or in the potential event source area, we observe two noticeable changes over time. First, the  
658 tongue of this unnamed glacier (RGI60-17.01112, GLIMS ID: G289692E34781S) was much smaller in 1962 airphotos than it  
is in 2020. Its advance of roughly 1.5 km since 1962, most of which occurred between 1975 and 1986 (Landsat), is in stark  
660 contrast to the pronounced shrinkage of the other glaciers in the area (Fig. 16 and 18). Indeed, differencing a DEM, which we  
produced from 1962 stereo-airphotos, from the SRTM or TanDEM-X DEMs confirms elevation gains on the glacier tongue  
662 of up to 120 m between 1962–2000 (SRTM), or up to 150 m between 1962 and 2010–2015 (TanDEM-X; Fig. 18c). This  
development could point to the recovery of the glacier tongue after a removal some time before 1962. The volume gain of the  
664 glacier tongue between 1962 and 2000 is around  $70 \cdot 10^6 \text{ m}^3$ , or  $100 \cdot 10^6 \text{ m}^3$  between 1962 and 2015.

Second, we detected an elevation decrease of the glacier forefield of around 10–15 m between 1962 and 2000, which could  
666 point to the deflation of debris-covered ground ice, deposited by a possible surge or glacier detachment (Fig. 18c). Third, a  
comparison of the 1962 airphotos to contemporary images revealed a heavily bulged glacier surface between 3900 m a.s.l. and  
668 4650 m a.s.l. (Fig. 18a,b). Visually, this bulging is similar to the bulge found on Flat Creek Glacier prior to its 2013 detachment  
(section 3.6). The slope of the glacier tongue is around 8–10°, and around 35° for the steep upper part. The bulging upper part  
670 of the glacier is far above the regional permafrost limit so that polythermal ice conditions might well be found in parts of it.

We also examined a 1955 Hycon aerial photo (no stereo data to produce a DEM available to us), but visual interpretations  
672 from it remain inconclusive. Under illumination conditions that are very different from those of the 1962 images, the headwall  
glacierisation and the tongue seem larger in 1955 than in 1962, resembling rather its shape and extent of the 1980s. Below the  
674 position of the current (2020) glacier terminus, there seem to be dead-ice remains visible in the 1955 images. These are also  
visible in the 1962 images, though shrunk. It remains thus to be clarified at this point to which extent the features observed



676 can be explained by a surge, or series of surges of the glacier before 1955, or between 1955 and 1962, or by a detachment-like  
677 event.

678

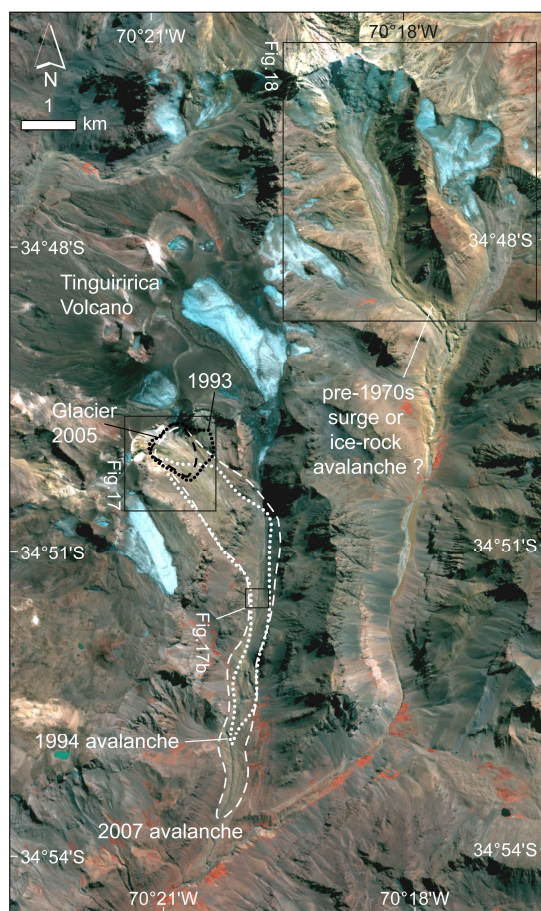

680 **Figure 16: Tinguiririca Volcano, Chilean Andes. Outlines of the 1994 and 2007 ice-rock avalanches, and the 1993 and**  
681 **2005 area of the detached glacier as dotted or dashed lines, respectively. These outlines have been digitised for this**  
682 **study but were found to agree well with the ones in Iribarren Anaconda et al. (2015). Satellite image: Sentinel-2 (EU**  
**Copernicus), 14 Mar 2020.**



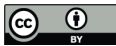

684

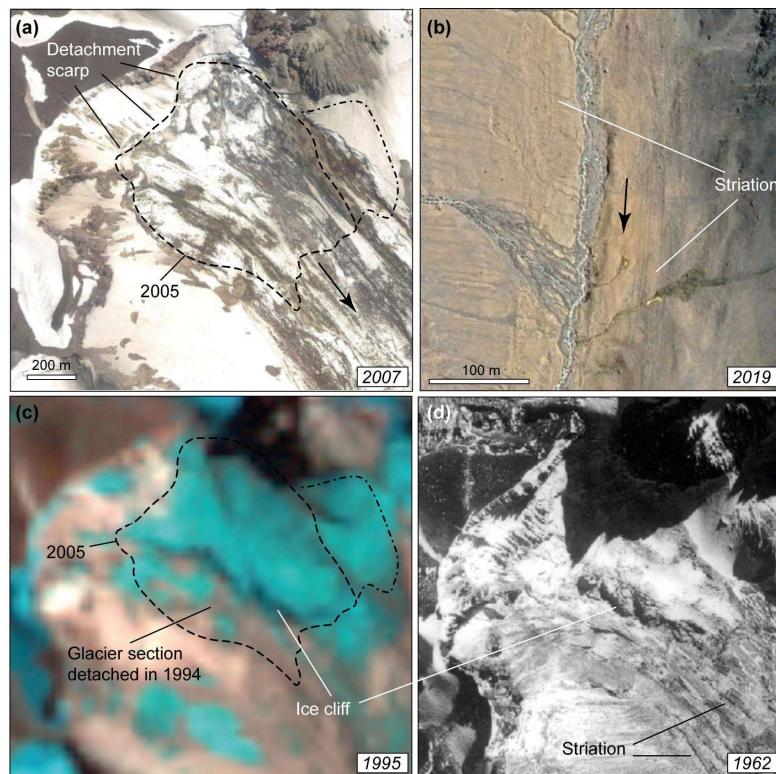

686

**Figure 17:** (a) Glacier detachment area at Tinguiririca Volcano on 24 Jan 2007 (satellite image: © Google Earth and Maxar). Glacier outlines from 26 Feb 2005 Landsat data (latest snow-free image before 2007 detachment) indicated by dashed line. From the 30-m resolution Landsat data it is unclear whether the dash-dotted ice section was connected to the main glacier. (b) Striations left by the 2007 ice-rock avalanche (30 Jan 2019; © Google Earth and CNES/Airbus). (c) A Landsat image of 19 Mar 1995 (first snow-free image after 1994 detachment) shows that the southern part of the glacier detached in the 1994 event. Glacier outlines of 2005 dashed as in (a). (d) The glacier on an aerial image of 8 Apr 1962 (© National Geographical Institute of Argentina). Clearly, a glacier section similar to the 1994 event has detached not long before the image date, leaving also a similar ice cliff. Striations or streamlined features of debris/ice remains from the resulting avalanche are still well visible.



696

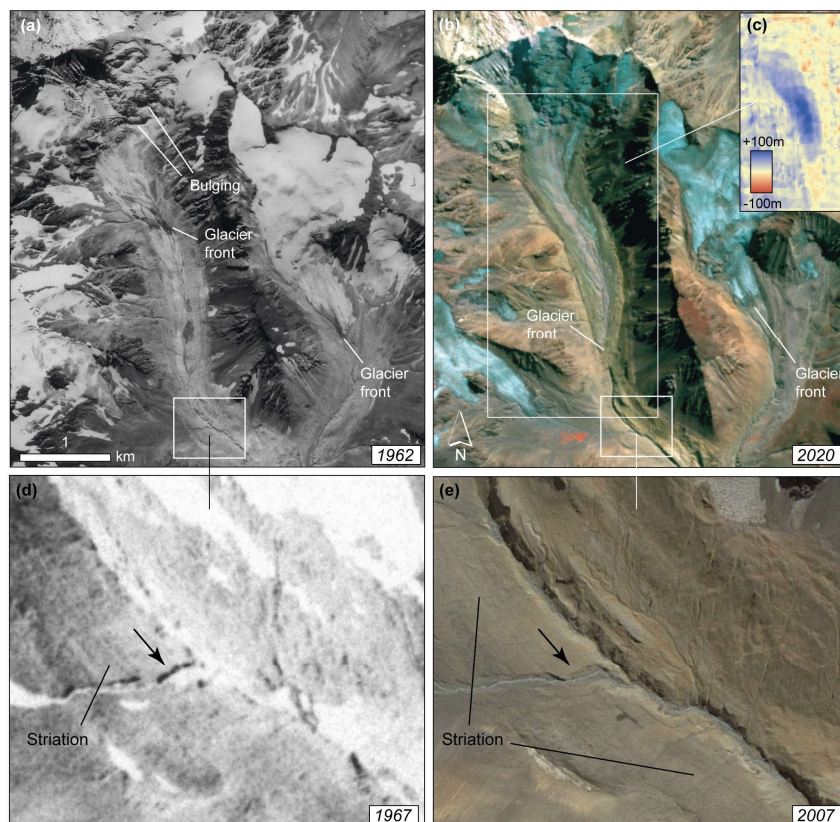

698 **Figure 18:** Glacier valley with potential former surge or glacier detachment, east of Tinguiririca Volcano. See Fig. 16  
700 for location. (a) Orthoprojected airphoto of 8 Apr 1962 (© National Geographical Institute of Argentina). (b) EU  
702 Copernicus Sentinel-2 image of 14 Mar 2020, showing an advance of 1.5 km relative to 1962, in contrast the other  
704 retreating glaciers in the area. (c) Elevation differences between DEMs from 1962 stereo airphotos and the 2000 SRTM  
show gains over the glacier tongue of up to 120 m, and losses of around 10-15 m in the forefield. (d) Corona satellite  
image of 23 Feb 1967 with striations. (e) Satellite image of 19 Mar 2007 (© Google Earth and Maxar). (a) and (b), and  
(d) and (e) show the same terrain section each. Locations of (c), (d) and (e) indicated as white rectangles in (a) and (b).



## 706 4 Discussion

### 4.1 Commonalities and differences

708 The most apparent similarities among the detachments compiled in this contribution (Tab. 1) are their geographic proximity  
710 to surge-type glaciers – in some cases the detached glaciers themselves exhibited surging or surge-like behaviour – as well as  
712 the existence of weak bedrock and/or fine sediments around and likely at the base of the glaciers (Tab. 2). Both commonalities  
714 suggest that the sudden detachments of low-angle glaciers discussed here could be seen as rare and extreme endmembers of  
716 the range (Quincey et al., 2015; Herreid and Truffer, 2016) of surge-type and surge-like glacier instabilities. The detachments  
718 could be a specific kind of glacier surge where the force balance cannot be achieved by a global control, typically by geometric  
720 adaptation, when basal friction is suddenly reduced. In combination with a low bed roughness and an absence of sufficient  
722 topographic support, the reduced amount of stress accommodated by basal resistance has nowhere to be transferred to and  
724 leads to an expanding force imbalance (Thogersen et al., 2019). This ultimately leads to a runaway acceleration and  
726 detachment.

*this is not quite the right terminology. The glacier is in force balance until failure occurs. This is a sudden transition.*

718 In this context, we note that the surface slopes of the detached glaciers were between 9° and 21° (average 15.9°, standard  
720 deviation 3.6°), which is at the upper end for slopes of surge-type glaciers, yet surprisingly low for glaciers causing ice  
722 avalanches. The slope range of around 10–20° may be a necessary condition for glacier detachments, as these – for surge-type  
724 glaciers – comparably high slopes are large enough to increase the probability of exceeding a critical shear stress and thus  
726 allowing for sudden basal failure. At the same time, glaciers within the 10–20° slope range still have considerable thickness  
728 and thus volume, while higher slopes sustain thinner glaciers and much smaller volumes involved in a potential failure (Fig.  
730 1c). Our very limited data base of detachment events suggests a transition between larger and smaller detachment volumes at  
732 roughly around 14° (Fig. 1c).

726 From a more mechanical point of view, low-angle glacier detachments can also be seen as part of the continuum between  
728 surges and ice break-offs from steep glaciers. Not least owing to their slope, glaciers have a range of possibilities to adapt to  
730 changes in their stress regimes (see Fig. 18). Flat glaciers can respond by adjusting their geometry, for instance through advance  
732 and surging. On very steep terrain, glaciers may not be able to adjust their geometry smoothly and ice breaks off. In contrast  
734 to the factors involved in typical ice break-offs from steep glaciers (see section 1), glacier detachments appear to have in  
736 common basal failure on soft beds. Therefore, low-angle glacier detachments combine the elements of both instability  
738 processes: the inability to rapidly adjust geometry in response to stress changes, similar to steep glaciers, and a surge-like  
740 process that propagates an initial instability through large parts of the glacier (Thogersen et al., 2019), allowing entire glacier  
742 tongues to be mobilized. The latter framework for low-angle glacier detachments and the above one of surge endmembers are  
744 not mutually exclusive but rather linked by the role of glacier slope, fine basal tills, and the surge-like propagation of  
746 instabilities.



738 The role of basal water pressure in the detachments is difficult to examine in detail, but most detachments could have involved  
739 severe reduction in friction due to high basal water pressure (likely at least for Kolka 2002, Aru, Flat Creek, Sedongpu,  
740 Aparejo). Ways to rapidly increase basal water pressure include: an increase in water input (e.g., large high-altitude rain events  
741 (Kääb et al., 2018) or increased surface snow/ice melt) into a subglacial drainage system not capable of adjusting fast enough;  
742 inefficiencies or blockages of this drainage system; or increased permeability of the glacier through enhanced crevassing  
743 (Dunse et al., 2015). Sudden weakening of the strength of subglacial till under high pore water pressure and over large parts  
744 of the glacier bed was shown to be a key process leading to the Aru detachments (Gilbert et al., 2018). Ongoing surge-like  
745 activity may enhance sensitivity to water input (Flowers et al., 2016).

746 In Figure 18 we attempt to summarize the main drivers of the glacier detachments described here. We define a detachment's  
747 *disposition* as the sum of long-term factors that might promote glacier detachments and refer to *triggers* to describe short-term  
748 factors that might suddenly tip the scale toward a catastrophic failure. Fundamentally, it seems that different combinations of  
749 dispositions and triggers are able to produce instability. Aside from the commonalities mentioned above, the observed  
750 detachments all present some unique conditions, many of which remain shrouded in uncertainty. The observed failure  
751 conditions (Tab. 2) include ruptures during surge-like glacier instabilities (Kolka 1902, Aru, Amney Machen, Sedongpu;  
752 unclear for Devdorak), or increase of driving stress due to thickening caused by snow accumulation (Aru) or rock-ice  
753 avalanches (Kolka 2002, Sedongpu?). Geothermal activity could have played a role at Tinguiririca and Kolka, but is unlikely  
754 for the other events. The thermal setting of the detached glaciers can play a role if permafrost around the glaciers potentially  
755 causes frozen margins or the glaciers exhibit a polythermal structure (Aru, Flat Creek, Tinguiririca?, Leñas?). However, other  
756 detachments happened under conditions very likely free of cold ice. Some of the detached glaciers seem to have been composed  
757 of a mixture of debris and ice (Amney Machen, Flat Creek; likely at least for Devdorak, Kolka, Sedongpu). Such mixtures can  
758 be profoundly weaker than clean glacier ice, particularly at temperatures close to the melting point (Moore, 2014), but it is  
759 unclear at this point whether and how these mixtures and their weakness may have contributed to the detachments. In contrast,  
760 the ice of the Aru glaciers clearly consisted of rather clean ice. Failure circumstances are particularly unclear to us for Aparejo  
761 and Leñas.

762 The angles of reach of the ice-rock avalanches associated with glacier detachments (Fahrböschung between about 5° and 10°),  
763 both absolutely and relative to their volume, are lower or at the lower end of those observed for other types of ice-rock  
764 avalanches (Fig. 1a, b). The particularly high ice content of glacier detachments might reduce friction of the mass movements  
765 through liquefaction (Schneider et al., 2011), promoting the long runouts. Remarkably, many (all?) detached glaciers appear  
766 to have sat on particularly fine-grained glacier beds. The large amounts of soft sediments under the glaciers, combined with  
767 the presence of (unusually?) large amounts of basal water at the time of detachments, may have decreased the friction angle  
768 by lubrication and allowed the detachments to accelerate particularly fast on a basal slurry. In addition, smooth u-shaped glacial  
769 valleys might favour low angles of reach by channelizing the mass flows, reducing energy dissipation, and presenting few  
770 topographic obstacles along the path (Schneider et al., 2011).

the friction  
angle is a  
sediment  
property and  
independent of  
water pressure

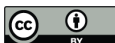

770 **4.2 Influence of climate change**

Inevitably, questions arise as to what extent climate change could be a driving factor of glacier detachments. Some cases investigated here suggest situations where repeated detachments could be part of a cycle from reservoir refilling up to occasional threshold exceedance, similar to what is found for glacier surges (Benn et al., 2019; Amney Machen, Tinguiririca, Devdorak, Kolka, Rasht?). But several cases of this study also illustrate developments where climate change can cause transient conditions that lead to failure. The twin Aru detachments, which detached within just two months of each other, strongly point to a common meteorological trigger as the only possible external driver able to synchronize the two events. A number of dispositions and triggers listed in Fig. 18 may be impacted by climatic changes and may bring a glacier closer to failure. Repeated detachments of the same glacier, or detachments connected to surge-like behaviour, require that the climate conditions and associated glacier mass balances enable reservoir recovery or built-up of accumulation areas (Devdorak, Aru, Amney Machen, Kolka 1902). Climate change might shift glaciers out of the envelope of conditions that are favourable for surging, or shift them into it (Hock et al., 2019). Whereas glacier rebuilding seems to be underway at Kolka and Aru, it is open for Sedongpu, and unlikely for Tinguirica. The glacier's potential to regain a substantial size is critically linked to the potential for repeated detachment events, and thus important for hazard management.

*and also for some steep glacier failures*

*or prevent future events*

The enhanced rock-ice avalanching onto Kolka Glacier in 2002, possibly responsible for its detachment, or the 2017 Gyala Peri rock avalanche over the Sedongpu Glacier, are likely a reflection of climate change impact on polythermal, glacierised rock walls, where the reduction of ice cover and permafrost thaw increases the rock and ice fall frequency (Fischer et al., 2013). Indeed, summers were exceptionally warm and glacier mass balances negative in the Caucasus Mountains, which host Kolka Glacier, over 1998–2001 (Zemp et al., 2019). Glacier shrinkage due to negative mass balance (Larsen et al., 2015; Treichler et al., 2019; Zemp et al., 2019) has exposed large parts of the – at earlier times mostly ice-covered – headwalls of Flat Creek, Amney Machen, Leñas, and likely Petra Pervogo/Rasht. This exposes bedrock to erosion making it available for mass flows and incorporation in and underneath the glaciers, a process that is particularly important for soft rock lithologies. The partial loss of glacier cover may also interrupt existing patterns of stress transfer and cause new temporary stress concentrations (see also Fig. 18) that may exceed stability thresholds in certain locations. Some glacier detachments could thus be connected to the transient development of headwall glacier loss.

Climate change increases the amount of meltwater and transitions from snowfall to rainfall, and may thus favour development of instabilities, at least for the polythermal glaciers (Aru and Flat Creek) where such amount of meltwater is unusual at the scale of the last century. The relative increase of meltwater can be particularly significant for cold/dry climate glaciers.

798 **4.3 Hazard management**

From a more applied hazard management perspective, sudden massive glacier detachments pose a high magnitude/low-frequency problem, and their low probability/high consequence nature makes them hard to incorporate in hazard management



and planning. The particularly low friction coefficients ( $H/L$ ) involved in the detachments enable them to travel over low slopes (where other types of ice-rock avalanches would stall) and to cover large distances. The detachment events seem very rare, but their large volumes, fast evolution, and the exceptionally long reaches and high speeds hold the potential for severe impacts even far away from the source. Our compilation of all (so far) known cases shows that low-angle glacier detachments might have, though rare, more frequently occurred than thought. The differences between the events suggest that there is no straightforward way to predict where they might occur, but the following list of the most common conditions might support a more systematic assessment. Events happened at places

- (i) with abundant weak bedrocks/fine sediments,
- (ii) where glacier surface slope is between about  $10^\circ$  and  $20^\circ$ ,
- (iii) where surge-like glacier instabilities are observed in the region, or for the detached glacier itself, and
- (iv) where similar events or other violent ice-rock mass flows have happened before (based on direct observation or a geomorphological imprint).

This set of very rough qualitative criteria might allow a first-order assessment of whether glacier detachments are possible in any given region. It is crucial to be aware of, however, that these criteria and their interplay are likely transient so that in particular criterion (iv) can be misleading. For several of the events we find streamlined debris features or striations in the avalanche paths, but highlight that more research is necessary to correctly interpret these signatures and differentiate them from glacial flutes, small moraines, and other longitudinal glacial and geomorphodynamic features. Particularly important for hazard management is – yet again – the conclusion that climate change is able to shift hazard zones beyond historical precedence, so that also so far unaffected areas might suddenly be susceptible (Hock et al., 2019).

Systematic monitoring turns out to be one of the most feasible responses to changes in hazard conditions, and the increasing temporal and spatial resolution, and improving availability of satellite imagery, is particularly helpful for glacier detachment assessment. For several of the cases in this contribution, abnormal glacier crevassing and accelerating precursory speeds were visible days to weeks before failure (Kolka 2002, Rasht, Aru, Sedongpu, Flat Creek?), but the significance of such a development was realized for the second Aru detachment only due to its spatial and temporal proximity to the first Aru detachment. On the other hand, abnormal crevassing does not necessarily indicate an impending detachment, see Rasht 2007 or Leinss et al. (2019), where the glacier geometry has likely stabilized a detaching ice mass. Overall, predicting glacier detachments can likely only be achieved by strong efforts in detailed remote-sensing based monitoring and, if feasible, by ground-based measurements, which contribute to an improved understanding of conditions and relevant processes, past events, glacier velocities and slope deformations, glacier bed geology and lithology, surge behaviour and dynamics, and short-term and long-term temperature and precipitation records (Kääb et al. 2018).

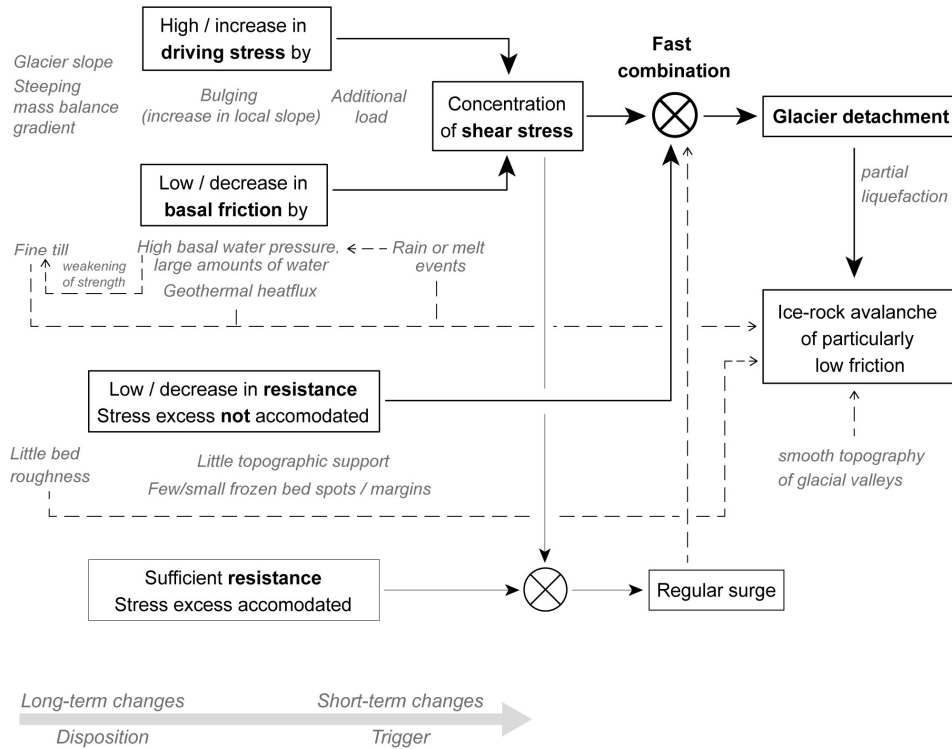

832

834 **Figure 18: Schematic on which conditions and changes to a low-angle mountain glacier can in combination lead to the**  
 835 **spatio-temporal interference of particularly high and concentrated shear stresses and low resistance, eventually**  
 836 **exceeding stability thresholds and causing detachment. The failure conditions can change at a range of time scales, so**  
 837 **that detachment is the result of a highly transient and rare interplay of factors. It is key that the low basal friction and**  
 838 **high driving stresses, the resulting concentration of high shear stresses, and the lack of sufficient resistance develop**  
 839 **rapidly, or are combined rapidly, preventing the glacier to adjust to changing forces in a steady way. Several of the factors**  
 840 **potentially involved in the detachment are subsequently also able to strongly reduce basal friction of the resulting ice-**  
 841 **rock avalanche and lead thus to particularly low angles of reach. Boxes in the figure indicate main physical conditions,**  
 842 **grey italic text indicates different actual processes that can fulfil these conditions, sorted from long-term (left) to short-**  
 843 **term (right) variability.**

## 5 Conclusions

844 In this contribution we describe around a dozen ice-rock avalanche events that we characterize as sudden large-volume  
 845 detachments of low-angle glaciers. Overall, these events seem to be more frequent than previously thought. The detached  
 846 volumes ranged from a few up to more than  $100 \cdot 10^6 \text{ m}^3$ . We described one new event in the same size-class as the 2002 Kolka



and the 2016 Aru glacier detachments (Sedongpu 2018) and as a side-result quantified one of the larger high-mountain rock  
848 avalanches of recent decades (Gyala Peri 2017).

Despite the relatively low number of low-angle glacier detachments and their site-specific variations that leave considerable  
850 uncertainties, we were able to identify a set of conditions and evolutions likely involved in these glacier failures. We consider  
this an important step, given that a few years ago the possibility for low-angle mountain glaciers to detach and produce massive  
852 ice-rock avalanches was hardly known. Interestingly, the fact that the spatio-temporal factor combinations leading to  
exceptionally low basal friction and very high shear stresses, and eventually to detachment, are different among the cases,  
854 suggests that there exists an exceptional but still fundamental possibility of low-angle glacier beds to fail catastrophically.  
Awareness of this fundamental potential for catastrophic basal instability expands our understanding of glacier flow.

856 Many of the glacier detachments show some relation to surge-type glacier movement, and could be seen as a rare and extreme  
endmember of this much more common glacier instability. Glacier detachments combine elements of surging, where the glacier  
858 adjusts its geometry to satisfy the force balance, with those of ice break-offs from steeper glaciers, where the glacier is not  
able to adjust in a steady way. The surface slopes of 9–21° of the detached glacier parts, though quite low for glaciers that  
860 produce ice avalanches, rank rather high in comparison with surge-type glacier tongues. Slopes in this range exert higher shear  
stresses than is typical for surge-type glaciers and favour thus the possibility of exceeding a critical stress level that then leads  
862 to sudden failure. At the same time, in comparison to glaciers in very steep terrain that tend to be thin, glaciers of 10–20°  
surface slope can build up thicker ice, which leads to the larger volumes typically involved in detachments.

864 Weak bedrock and/or the existence of soft and highly erodible sediments under the detached glaciers was identified for most  
of the observed glacier detachments, plausible for the ones we determined retroactively, and hints at till-strength weakening  
866 under high pore water pressure as a concrete failure process. There appear to be different trajectories into, or out of, the narrow  
envelope of potential failure conditions, not least driven by climatic changes. The fact that most collapses happened during  
868 local spring/summer suggests that a meltwater or high-altitude rain driven increase of basal pore water pressure can play an  
important role in triggering the events, whether directly or in some delayed form. Atmospheric warming enhances such hazard  
870 conditions. For some detachment sites, negative regional glacier mass balances can prevent detached glaciers from fully  
rebuilding and thus from detachments to repeat over time, at least at earlier volumes.

872 Detailed investigations of the events described in this study showed that a wide variety of dispositions and triggers can lead to  
a glacier detachment. This makes it challenging for practitioners working in high-mountain hazard management to anticipate  
874 and predict such events. From this practical standpoint, however, this study attempts to raise awareness about the – albeit low  
– possibility of sudden, large-volume detachments of low-angle glaciers at locations with

- 876
- particularly soft and erodible lithologies, and, likely related, the
  - existence of surge-type glaciers and surge-like glacier evolution.



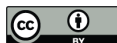

- 878       • Repeated events or geomorphological imprints of potential earlier collapses or other violent ice-rock mass flows can  
880       be further investigated, but events can also happen without historical precedence through shifts in the array of failure  
882       conditions.
- Several of the glaciers investigated here showed abnormal crevassing and enhanced precursory surface speeds in the  
882       days to weeks before detachment.
  - The surface slopes found in this study for the detached glaciers ranged between roughly 10° and 20°.

884       Due to the large amounts of snow and ice involved in glacier detachments, the high chance of lubrication and of liquefaction  
886       of glacier ice and subglacial sediments, and smooth geometries of glacial valleys, avalanche friction is typically greatly  
888       reduced. This results in the particularly high mobility of the ice-rock avalanches resulting from low-angle glacier detachments  
890       and can lead to substantial damage far from the source. Between the large runout distances and the varying factors that can  
890       impact a glacier's detachment probability, high-mountain hazard management will, after the first general assessment provided  
890       in this study, benefit from more detailed investigations of glacier detachments, the conditions that lead to them and the  
890       mechanics that drive them.

892



**Table 1: Parametres for the low-angle glacier detachments of this contribution. For repeat events the parameters given refer to the underlined year.**

894

| Name of event | Region              | Years                                    | Lat, Lon            | GLIMS,RGI IDs                                               | Reach L (km) | Drop H (km) | Volume (10 <sup>6</sup> m <sup>3</sup> ) | Glacier surface slope (°) | Section |
|---------------|---------------------|------------------------------------------|---------------------|-------------------------------------------------------------|--------------|-------------|------------------------------------------|---------------------------|---------|
| Devdorak      | Caucasus            | 1776, 1778, 1785, 1808, 1817, 1832, 2014 | 42.72°N, 44.55°E    | G044517E4271 3N, RGI60-12.00840                             | 10.5         | 3.2         | 15                                       | 17?                       | 3.1     |
| Kolka         | Caucasus            | ~1835?,1902, <u>2002</u>                 | 42.73°N, 44.44°E    | G044447E4273 3N, RGI60-12.00131                             | 19           | 2.0         | 130                                      | 13                        | 3.1     |
| Rasht         | Pamirs              | 2017                                     | 38.975N 70.850E     | G070852E3897 4N, RGI60-13.18284; USSR 504                   | 7.6          | 1.4         | 6                                        | 16                        | 3.2     |
| Rasht         | Pamirs              | 2019                                     | 38.989° N 70.693° E | G070689E3898 1N, RGI60-13.20645; USSR 518                   | 6.7          | 1,5         | 4.5                                      | 20                        | 3.2     |
| Aru 1         | Western Tibet       | Jul 2016                                 | 34.02° N, 82.250° E | G082249E3402 3N, RGI RGI60-13.51473, Chinese: CN52412C0011  | 8.2          | 0.8         | 68                                       | 12                        | 3.3     |
| Aru 2         | Western Tibet       | Sep 2016                                 | 34.00° N, 82.265° E | G082268E3400 5N, RGI60-13.51476, Chinese inv.: CN52412C0007 | 7.2          | 0.83        | 83                                       | 13                        | 3.3     |
| Amney Machen  | Eastern Tibet       | <u>2004</u> ,2007, 2016,2017,2019        | 34.82°N 99.44°E     | G099443E3482 4N, RGI60-13.23943, Chinese inv: CN5J352E0017, | 5.2          | 1.0         | 27                                       | 15                        | 3.4     |
| Sedongpu      | South-eastern Tibet | 2018                                     | 29.80° N 94.92° E   | G094940E2981 1N, RGI60-13.01391, Chinese inv.: SDP1         | 8            | 1.3         | 100                                      | 9                         | 3.5     |
| Flat Creek    | Saint Elias Mts.    | 2013, <u>2015</u> , 2016                 | 61.50° N, 141.54° W | G218441E6163 8N, RGI60-01.17460                             | 11           | 1.1         | 14                                       | 21                        | 3.6     |
| Aparejo       | Chilean Andes       | 1980                                     | 33.56° S, 70.01° W  | only World Glacier Inv. CL1M005D004 9                       | 3.7          | 0.8         | 7.2                                      | 20                        | 3.7     |
| Leñas         | Argentinean Andes   | 2007                                     | 34.46° S 70.05° W   | G289941E3445 9S, RGI60-17.01251                             | 2            | 0.2         | 4.2                                      | 15                        | 3.8     |
| Tinguiririca  | Chilean Andes       | ~1960,1994, <u>2007</u>                  | 34.83° S 70.35° W   | only World Glacier Inv. CL1M00420016                        | 7.9          | 1.4         | 12                                       | 20                        | 3.9     |



896

**Table 2: Possible indicators for and factors involved in low-angle glacier detachments.**

| Name of event | Earlier surges in the region? | Weak rocks, fine sediments ? | Glacier tongue within permafrost ? | Abnormal crevassing before failure? | Enhanced water input into glacier (melt, rain) ? | Repeat events known? | Signs of high water pressure ? | Signs of earlier mass flows? | Surge-like activity related to event? | Loading prior to event (snow, rock)? | Earlier surges same glacier ? | Bulging before event? |
|---------------|-------------------------------|------------------------------|------------------------------------|-------------------------------------|--------------------------------------------------|----------------------|--------------------------------|------------------------------|---------------------------------------|--------------------------------------|-------------------------------|-----------------------|
| Kolka         | yes                           | uncertain yes                | uncertain yes                      | unknown                             | unknown                                          | uncertain no         | uncertain no                   | no                           | no                                    | no                                   | no                            | no                    |
| Devdorak      | yes                           | uncertain yes                | uncertain yes                      | unknown                             | unknown                                          | uncertain no         | uncertain no                   | no                           | no                                    | no                                   | no                            | no                    |
| Aru           | yes                           | uncertain yes                | uncertain yes                      | unknown                             | unknown                                          | uncertain no         | uncertain no                   | no                           | no                                    | no                                   | no                            | no                    |
| Sedongpu      | yes                           | uncertain yes                | uncertain yes                      | unknown                             | unknown                                          | uncertain no         | uncertain no                   | no                           | no                                    | no                                   | no                            | no                    |
| Rasht         | yes                           | uncertain yes                | uncertain yes                      | unknown                             | unknown                                          | uncertain no         | uncertain no                   | no                           | no                                    | no                                   | no                            | no                    |
| Amney Machen  | yes                           | uncertain yes                | uncertain yes                      | unknown                             | unknown                                          | uncertain no         | uncertain no                   | no                           | no                                    | no                                   | no                            | no                    |
| Flat Creek    | yes                           | uncertain yes                | uncertain yes                      | unknown                             | unknown                                          | uncertain no         | uncertain no                   | no                           | no                                    | no                                   | no                            | no                    |
| Tinguiririca  | yes                           | uncertain yes                | uncertain yes                      | unknown                             | unknown                                          | uncertain no         | uncertain no                   | no                           | no                                    | no                                   | no                            | no                    |
| Aparejo       | yes                           | uncertain yes                | uncertain yes                      | unknown                             | unknown                                          | uncertain no         | uncertain no                   | no                           | no                                    | no                                   | no                            | no                    |
| Leñas         | yes                           | uncertain yes                | uncertain yes                      | unknown                             | unknown                                          | uncertain no         | uncertain no                   | no                           | no                                    | no                                   | no                            | no                    |

898

yes      uncertain yes      unknown      uncertain no      no

900



## 902 **Code availability**

Not relevant

## 904 **Data availability**

Sentinel-1 and Sentinel-2 data are freely available from the ESA/EC Copernicus Sentinels Scientific Data Hub at  
906 <https://scihub.copernicus.eu> (Copernicus, 2020), Landsat satellite data, Corona satellite data, and SRTM-C DEMs from United  
States Geological Survey (USGS, 2020), SRTM-X and TanDEM-X DEMs from the German Aerospace Center (DLR, 2020),  
908 the ALOS World DEM from the Japan Aerospace Exploration Agency (JAXA, 2020), Chinese earthquake data from the China  
Earthquake Data Center. Planet data (Dove and RapidEye) are not openly available as Planet is a commercial company.  
910 However, scientific access schemes to these data exist (<https://www.planet.com/markets/education-and-research/>). Data from  
Maxar satellites (GeoEye, Ikonos, WorldView, Quickbird) and Airbus (Pléiades, Spot) are commercial, but in parts explorable  
912 from GoogleEarth and BingMaps.

## **Author contribution**

914 A.K. wrote the text, did most new analyses and prepared the figures. M.J. wrote parts of the text, edited all text, and contributed  
comments and discussions. L.G. prepared the Sedongpu DEMs. All authors edited text and contributed with data, comments  
916 and discussions.

## **Competing interests**

918 All authors declare that they have no competing interests.

## **Acknowledgements**

920 This paper is an extended and updated version of the Louis Agassiz medal lecture by A.K. given at the European Geosciences  
Union General Assembly 2019.

922 The underlying work was funded by the ESA projects GlobPermafrost, Permafrost-cci, Glaciers\_cci, and the ESA  
EarthExplorer10 Mission Advisory Group, and the European Research Council under the European Union's Seventh



924 Framework Programme. We are grateful to the providers of free data for this study; European Space Agency (ESA) / European  
925 Commission (EC) Copernicus for Sentinel-2 data, USGS for Landsat, Corona, and SRTM data, DLR for SRTM and TanDEM-  
926 X data, and Planet for their cubesat data via Planet's Ambassadors Program. E.B. and S.G. acknowledge support from the  
927 French Space Agency (CNES) through TOSCA and DINAMIS programs. S.C. acknowledges support from Lomonosov  
928 Moscow State University on the theme "Mapping, modeling and risk assessment of dangerous natural processes". D.P. and  
929 S.C. acknowledge the Russian Foundation for Basic Research (grant 18-05-00520). Paola Banegas from SEGEMAR Mendoza  
930 provided the 1962 aerial photos over Tinguririca.

### Financial support

932 This work was funded by the ESA projects Permafrost\_CCI (4000123681/18/I-NB), Glaciers\_CCI (4000109873/14/I-NB,  
4000127593/19/I-NS), and the ESA EarthExplorer10 Mission Advisory Group (4000127656/19/NL/FF/gp), by the European  
934 Research Council under the European Union's Seventh Framework Programme (FP/2007-2013) / ERC grant agreement no.  
320816, and the Russian Foundation for Basic Research (grant 18-05-00520)

936



## 938 References

- 940 Alean, J.: Ice avalanche activity and mass balance of high-altitude hanging glaciers in the Swiss Alps, 6, 248-249, 1985.
- 942 Aristov, K. A., Petrakov, D. A., Kovalenko, N. V., Timonin, S. A., Kolchin, A. A., and Drobyshev, V. N.: Monitoring of  
Kolka Glacier in 2014–2017 by terrestrial stereophotogrammetry. *Led i Sneg. Ice and Snow [In Russian]*, *Led i Sneg*  
(Ice and Snow), 59, 49–58, <https://doi.org/10.15356/2076-6734-2019-1-49-58>, 2019.
- 944 Asoyan, D. S., and Rototaeva, O. V. Devdoraki Glacier, Kazbek: history of studies of natural hazards in XIX and the  
beginning of XXI centuries. *Led i Sneg. Ice and Snow*, 56(2): 253-264, 2016. <https://doi.org/10.15356/2076-6734-2016-2-253-264>
- 946 Benn, D. I., Fowler, A. C., Hewitt, I., and Sevestre, H.: A general theory of glacier surges, *J Glaciol*, 65, 701-716,  
948 <https://doi.org/PII S0022143019000625>, 10.1017/jog.2019.62, 2019.
- Braun, M. H., Malz, P., Sommer, C., Farias-Barahona, D., Sauter, T., Casassa, G., Soruco, A., Skvarca, P., and Seehaus, T.  
950 C.: Constraining glacier elevation and mass changes in South America, *Nat Clim Change*, 9, 130-+,  
<https://doi.org/10.1038/s41558-018-0375-7>, 2019.
- 952 Brenning, A.: Geomorphological, hydrological and climatic significance of rock glaciers in the Andes of Central Chile (33–  
35°S), 16, 231-240, <https://doi.org/10.1002/ppp.528>, 2005.
- 954 Brun, F., Berthier, E., Wagnon, P., Kääh, A., and Treichler, D.: A spatially resolved estimate of High Mountain Asia glacier  
mass balances from 2000 to 2016, *Nature Geosci*, 10, 668-673, <https://doi.org/10.1038/ngeo2999>, 2017.
- 956 Caplan-Auerbach, J., and Huggel, C.: Precursory seismicity associated with frequent, large ice avalanches on Iliamna  
volcano, Alaska, USA, *J Glaciol*, 53, 128-140, <https://doi.org/Doi 10.3189/172756507781833866>, 2007.
- 958 Chen, C., Zhang, L. M., Xiao, T., and He, J.: Barrier lake bursting and flood routing in the Yarlung Tsangpo Grand Canyon  
in October 2018, *J Hydrol*, 583, Artn 124603, <https://doi.org/10.1016/j.jhydrol.2020.124603>, 2020.
- 960 Chernomorets, S. S. New “Kazbek blockage” on 17 May 2014. *Priroda*, 7: 67-72  
<https://istina.msu.ru/download/6618200/1k5k5t:82mOHGauqEFijKJOHSXRSTVDIT8/> (in Russian), 2014.
- 962 Chernomorets, S., Savernyuk, E., Petrakov, D., Dokukin, M., Gotsiridze, G., Gavardashvili, G., Drobyshev, V., Tutubalina,  
O., Zaporozhchenko, E., Kamenev, N., Kamenev, V., Kääh, A., Kargel, J., and Huggel, C.: The Devdorak ice-rock  
964 avalanche and consequent debris flow from the slope of Mt. Kazbek (Caucasus, Georgia) in 2014, EGU General  
Assembly Conference Abstracts, April 01, 2016, 2016.
- 966 Chernomorets, S. S., Tutubalina, O. V., Seinova, I. B., Petrakov, D. A., Nosov, K. N., and Zaporozhchenko, E. V.: Glacier  
and debris flow disasters around Mt. Kazbek, Russia/Georgia, in: *Debris-Flow Hazards Mitigation: Mechanics,*  
968 *Prediction, and Assessment*, edited by: Chen, C. L., and Major, J. J., Millpress, Netherlands, 2007.
- Clarke, G. K. C., Collins, S. G., and Thompson, D. E.: Flow, thermal structure, and subglacial conditions of a surge-type  
970 glacier, *Can J Earth Sci*, 21, 232-240, <https://doi.org/10.1139/e84-024>, 1984.
- Clarke, G. K. C., and Blake, E. W.: Geometric and thermal evolution of a surge-type glacier in its quiescent state - Trapridge  
972 Glacier, Yukon-Territory, Canada, 1969-89, *J Glaciol*, 37, 158-169, 1991.
- Copernicus Open Access Hub, Copernicus programme, European Commission and European Space Agency, available at:  
974 <https://scihub.copernicus.eu>, last access: 17 October 2019. , 2019.
- 976 Crandell, D. R., and Fahnestock, R. K.: Rockfalls and avalanches from little Tahoma Peak on Mount Rainier, Washington,  
U.S. Geol. Surv. Bull., 1221-A, A1-A30, 1965.



- 978 Dokukin, M. D., Bekkiev, M. Y., Kalov, R. H., Savernyuk, E. A., and Chernomorets, S. S.: Signs of catastrophic glacier  
detachments (Analysis of multitemporal space information) (In Russian), in: Dangerous natural and technogenic  
980 Dokukin, M. D., Savernyuk, E. A., and Chernomorets, S. S. Rock Avalanches in the Alpine Zone of the Caucasus in the 21  
Century. *Priroda*, 7: 52-62, 2015. (in Russian).
- 982 Dokukin, M. D., Bekkiev, M. Yu., Kalov, R. Kh., Chernomorets, S. S., and Savernyuk, E. A. Activation of rock avalanches  
in the Central Caucasus and their impact on the dynamics of glaciers and debris flows. – *Led i Sneg. Ice and Snow*,  
984 60(3): 361-378, 2020.
- 986 Drobushchev V.N., Torchinov H-M.Z., Tutubalina O.V., and Hubaev H.M. Main topographical data and kinematics of the  
Devdorakskiy collapse on May 17, 2014. *Vestnik of the Vladikavkaz Scientific Centre*, 4: 30-41, (in Russian), 2014.
- 988 Drobyshev, V. N.: Glacial catastrophe of 20 September 2002 in North Osetia, *Russian Jo. Earth Sci*, ES4004,  
<https://doi.org/doi:10.2205/2006ES000207>, 2006.
- 990 Dunse, T., Schellenberger, T., Hagen, J. O., Kääh, A., Schuler, T. V., and Reijmer, C. H.: Glacier-surge mechanisms  
promoted by a hydro-thermodynamic feedback to summer melt, *Cryosphere*, 9, 197-215, <https://doi.org/10.5194/tc-9-197-2015>, 2015.
- 992 Dussailant, I., Berthier, E., Brun, F., Masiokas, M., Hugonnet, R., Favier, V., Rabatel, A., Pitte, P., and Ruiz, L.: Two  
decades of glacier mass loss along the Andes, *Nat Geosci*, 12, 803-+, <https://doi.org/10.1038/s41561-019-0432-5>,  
994 2019.
- 996 Evans, S. G., Bishop, N. F., Smoll, L. F., Murillo, P. V., Delaney, K. B., and Oliver-Smith, A.: A re-examination of the  
mechanism and human impact of catastrophic mass flows originating on Nevado Huascarán, Cordillera Blanca, Peru  
in 1962 and 1970, *Eng Geol*, 108, 96-118, <https://doi.org/10.1016/j.enggeo.2009.06.020>, 2009a.
- 998 Evans, S. G., Tutubalina, O. V., Drobyshev, V. N., Chernomorets, S. S., McDougall, S., Petrakov, D. A., and Hungr, O.:  
Catastrophic detachment and high-velocity long-runout flow of Kolka Glacier, Caucasus Mountains, Russia in 2002,  
1000 *Geomorphology*, 105, 314-321, <https://doi.org/10.1016/j.geomorph.2008.10.008>, 2009b.
- 1002 Evans, S. G., and Delaney, K. B.: Catastrophic mass flows in the mountain glacial environment, in: *Snow and Ice-related  
Hazards, Risks, and Disasters*, edited by: Haeblerli, W., and Whitemann, C., *Hazards and Disasters Series*, Elsevier,  
Amsterdam, 563-606, 2015, <https://doi.org/10.1016/B978-0-12-394849-6.00016-0>.
- 1004 Faillettaz, J., Sornette, D., and Funk, M.: Numerical modeling of a gravity-driven instability of a cold hanging glacier:  
reanalysis of the 1895 break-off of Altelsgletscher, Switzerland, *J Glaciol*, 57, 817-831, 2011.
- 1006 Faillettaz, J., Funk, M., and Vincent, C.: Avalanching glacier instabilities: Review on processes and early warning  
perspectives, *Rev. Geophys.*, 53, 203-224, <https://doi.org/10.1002/2014rg000466>, 2015.
- 1008 Falaschi, D., Bolch, T., Lenzano, M. G., Tadono, T., Lo Vecchio, A., and Lenzano, L.: New evidence of glacier surges in the  
Central Andes of Argentina and Chile, *Prog Phys Geog*, 42, 792-825, <https://doi.org/10.1177/0309133318803014>,  
1010 2018a.
- 1012 Falaschi, D., Lenzano, M. G., Tadono, T., Vich, A., and Lenzano, L.: Balance de masa geodésico 2000-2011 de los glaciares  
de la cuenca del río Atuel, *Andes Centrales de Mendoza, Geoacta*, 42, 7-22, 2018b.
- 1014 Falaschi, D., Kääh, A., Paul, F., Tadono, T., Rivera, J. A., and Lenzano, L. E.: Brief communication: Collapse of 4 Mm(3) of  
ice from a cirque glacier in the Central Andes of Argentina, *Cryosphere*, 13, 997-1004, <https://doi.org/10.5194/tc-13-997-2019>, 2019.
- 1016 Fischer, L., Huggel, C., Kääh, A., and Haeblerli, W.: Slope failures and erosion rates on a glacierized high-mountain face  
under climatic changes, *Earth Surf. Proc. Land.*, 38, 836-846, <https://doi.org/10.1002/Esp.3355>, 2013.
- 1018 Flowers, G. E., Jarosch, A. H., Belliveau, P. T. A. P., and Fuhrman, L. A.: Short-term velocity variations and sliding  
sensitivity of a slowly surging glacier, *Ann Glaciol*, 57, 71-83, <https://doi.org/10.1017/aog.2016.7>, 2016.
- 1020 Fowler, A. C., Murray, T., and Ng, F. S. L.: Thermally controlled glacier surging, *J Glaciol*, 47, 527-538, <https://doi.org/Doi10.3189/172756501781831792>, 2001.



- 1022 Frappe, T. P., and Clarke, G. K. C.: Slow surge of Trapridge Glacier, Yukon territory, Canada, *J Geophys Res-Earth*, 112,  
Artn F03s32, <https://doi.org/10.1029/2006jf000607>, 2007.
- 1024 Gardelle, J., Berthier, E., Arnaud, Y., and Käab, A.: Region-wide glacier mass balances over the Pamir-Karakoram-  
Himalaya during 1999-2011, *Cryosphere*, 7, 1263-1286, 2013.
- 1026 Gilbert, A., Leinss, S., Kargel, J., Käab, A., Gascoïn, S., Leonard, G., Berthier, E., Karki, A., and Yao, T. D.: Mechanisms  
leading to the 2016 giant twin glacier collapses, Aru Range, Tibet, *Cryosphere*, 12, 2883-2900,  
1028 <https://doi.org/10.5194/tc-12-2883-2018>, 2018.
- Gruber, F. E., and Mergili, M.: Regional-scale analysis of high-mountain multi-hazard and risk indicators in the Pamir  
1030 (Tajikistan) with GRASS GIS, *Nat Hazard Earth Sys*, 13, 2779-2796, <https://doi.org/10.5194/nhess-13-2779-2013>,  
2013.
- 1032 Haeberli, W., Käab, A., Paul, F., Chiarle, M., Mortara, G., Mazza, A., and Richardson, S.: A surge-type movement at  
Ghiacciaio del Belvedere and a developing slope instability in the east face of Monte Rosa, Macugnaga, Italian Alps,  
1034 *Geology*, 30, 104-111, 2002.
- Haeberli, W., Huggel, C., Kaab, A., Zraggen-Oswald, S., Polkvoj, A., Galushkin, I., Zotikov, I., and Osokin, N.: The  
1036 Kolka-Karmadon rock/ice slide of 20 September 2002: an extraordinary event of historical dimensions in North  
Ossetia, Russian Caucasus, *J Glaciol*, 50, 533-546, <https://doi.org/Doi.10.3189/172756504781829710>, 2004.
- 1038 Harrison, W. D., and Post, A. S.: How much do we really know about glacier surging?, *Ann Glaciol*, 36, 1-6,  
<https://doi.org/Doi.10.3189/172756403781816185>, 2003.
- 1040 Harrison, W. D., Osipova, G. B., Nosenko, G. A., Espizua, L., Käab, A., Fischer, L., Huggel, C., Craw Burns, P. A., Truffer,  
M., and Lai, A. W.: Glacier Surges, in: *Snow and Ice-related Hazards, Risks, and Disasters*, edited by: Haeberli, W.,  
1042 and Whitemann, C., Elsevier, Amsterdam, 437-485, 2015.
- Hauser, A.: Rock avalanche and resulting debris flow in Estero Parraguire and Río Colorado, Región Metropolitana, Chile,  
1044 in: *Catastrophic Landslides: Effects, Occurrence, and Mechanisms*, edited by: Evans, S. G., and DeGraff, J. V.,  
Geological Society of America Reviews in Engineering Geology 15, Boulder, CO, 135-148, 2002.
- 1046 Herreid, S., and Truffer, M.: Automated detection of unstable glacier flow and a spectrum of speedup behavior in the Alaska  
Range, *J Geophys Res-Earth*, 121, 64-81, <https://doi.org/10.1002/2015jf003502>, 2016.
- 1048 Heybrock, W. Earthquakes as a Cause of Glacier Avalanches in the Caucasus. *Geographical Review* 25. (3): 423-429,  
<https://doi.org/10.2307/209310>, 1935.
- 1050 Hock, R., Rasul, G., Adler, C., Cáceres, B., Gruber, S., Hirabayashi, Y., Jackson, M., Käab, A., Kang, S., Kutuzov, S.,  
Milner, A., Molau, U., Morin, S., Orlove, B., and Steltzer, H.: High Mountain Areas, in: *IPCC Special Report on the  
1052 Ocean and Cryosphere in a Changing Climate (SROCC)*, edited by: Pörtner, H.-O., Roberts, D. C., Masson-Delmotte,  
V., Zhai, P., Tignor, M., Poloczanska, E., Mintenbeck, E., Alegria, A., Nicolai, M., Okem, A., Petzold, J., Rama, B.,  
1054 and Weyer, N. M., IPCC, Geneva, 2019.
- Hoinkes, H.: Die Ausbrüche (surges) des Kolka-Gletschers in Nord-Ossetien, Zentraler Kaukasus, *Z. Gletscherkd. Glazial-  
1056 geol.*, 253-270, 1972.
- Hu, K. H., Zhang, X. P., You, Y., Hu, X. D., Liu, W. M., and Li, Y.: Landslides and dammed lakes triggered by the 2017  
1058 Ms6.9 Milin earthquake in the Tsangpo gorge, *Landslides*, 16, 993-1001, <https://doi.org/10.1007/s10346-019-01168-w>, 2019.
- 1060 Huggel, C., Zraggen-Oswald, S., Haeberli, W., Käab, A., Polkvoj, A., Galushkin, I., and Evans, S. G.: The 2002 rock/ice  
avalanche at Kolka/Karmadon, Russian Caucasus: assessment of extraordinary avalanche formation and mobility, and  
1062 application of QuickBird satellite imagery, *Nat. Hazard. Earth Sys.*, 5, 173-187, <https://doi.org/10.5194/nhess-5-173-2005>, 2005.
- 1064 Huggel, C., Caplan-Auerbach, J., Waythomas, C. F., and Wessels, R. L.: Monitoring and modeling ice-rock avalanches from  
ice-capped volcanoes: A case study of frequent large avalanches on Iliamna Volcano, Alaska, *J Volcanol Geoth Res*,  
1066 168, 114-136, <https://doi.org/10.1016/j.jvolgeores.2007.08.009>, 2007.





- 1068 Huggel, C.: Recent extreme slope failures in glacial environments: effects of thermal perturbation, *Quaternary Sci Rev*, 28,  
1119-1130, <https://doi.org/10.1016/j.quascirev.2008.06.007>, 2009.
- 1070 Iribarren Anaconda, P., Mackintosh, A., and Norton, K. P.: Hazardous processes and events from glacier and permafrost  
areas: lessons from the Chilean and Argentinean Andes, *Earth Surf Proc Land*, 40, 2-21,  
1072 <https://doi.org/10.1002/esp.3524>, 2015.
- 1074 Jacquemart, M., and Loso, M.: Catastrophic glacier collapse and debris flow at Flat Creek, Wrangell-St. Elias National Park  
and Preserve. *Alaska Park Science* 18(1): 16-25., 18, 16-25, 2019.
- 1076 Jacquemart, M., Loso, M., Leopold, M., Welty, E., Berthier, E., Hansen, J. S. S., Sykes, J., and Tiampo, K.: What drives  
large-scale glacier detachments? Insights from Flat Creek glacier, St. Elias Mountains, Alaska, *Geol*,  
1078 <https://doi.org/10.1130/g47211.1>, 2020.
- 1080 Jiskoot, H.: Glacier surging, in: *Encyclopedia of Snow, Ice and Glaciers*, edited by: Singh, V. P., and Haritashya, U. K.,  
Springer, 415-428, 2011.
- 1082 Kamb, B.: Glacier surge mechanism based on linked cavity configuration of the basal water conduit system, *J Geophys Res-*  
Solid, 92, 9083-9100, <https://doi.org/10.1029/Jb092ib09p09083>, 1987.
- 1084 Khatisyan, G. S. The Kazbek glaciers in the period from 1862 to 1887. *Izvestiya Imperatorskago Russkago*  
1086 *Geograficheskago Obschestva* 24(5): 326-347 (in Russian), 1889.
- 1088 Kochtitzky, W., Jiskoot, H., Copland, L., Enderlin, E., McNabb, R., Kreutz, K., and Main, B.: Terminus advance, kinematics  
and mass redistribution during eight surges of Donjek Glacier, St. Elias Range, Canada, 1935 to 2016, *J Glaciol*, 65,  
565-579, <https://doi.org/10.1017/jog.2019.34>, 2019.
- 1090 Kotlyakov, V. M., Rototaeva, O. V., and Nosenko, G. A.: The September 2002 Kolka glacier catastrophe in North Ossetia,  
Russian Federation. Evidence and analysis, *Mt Res Dev*, 24, 78-83, 2004.
- 1092 Kotlyakov, V. M., Osipova, G. B., and Tsvetkov, D. G.: Monitoring surging glaciers of the Pamirs, central Asia, from space,  
48, 125-134, <https://doi.org/10.3189/172756408784700608>, 2008.
- 1094 Kotlyakov, V. M., Osipova, G. B., and Tsvetkov, D. G.: Investigations of the fluctuations of surge-type glaciers in the Pamir  
based on observations from space, in: *Glaciers of Asia*, U.S. Geological Survey Professional Paper 1386, edited by:  
Williams, R. S. J., and Ferrigno, J. G., USGS, 77-93, 2010a.
- 1096 Kotlyakov, V. M., Rototaeva, O. V., and Nosenko, G. A.: Fluctuations of Glaciers of the Central Caucasus and Gora El'brus,  
with a Section on the Glaciological Disaster in North Osetiya, in: *Glaciers of Asia*, U.S. Geological Survey  
Professional Paper 1386, edited by: Williams, R. S. J., and Ferrigno, J. G., USGS, 59-76, 2010b.
- 1098 Kutuzov, S., Lavrentiev, I., Smimov, A., Nosenko, G., and Petrakov, D.: Volume Changes of Elbrus Glaciers From 1997 to  
2017, *Front Earth Sc-Switz*, 7, <https://doi.org/10.3389/feart.2019.00153>, 2019.
- 1100 Kääh, A., Huggel, C., Barbero, S., Chiarle, M., Cordola, M., Epifani, F., Haeberli, W., Mortara, G., Semino, P., Tamburini,  
A., and Viazzo, G.: Glacier hazards at Belvedere Glacier and the Monte Rosa east face, Italian Alps: processes and  
mitigation, *Interpraevent*, 2004, 67-78,
- 1102 Kääh, A., Treichler, D., Nuth, C., and Berthier, E.: Brief Communication: Contending estimates of 2003–2008 glacier mass  
balance over the Pamir–Karakoram–Himalaya, *Cryosphere*, 9, 557-564, <https://doi.org/10.5194/tc-9-557-2015>, 2015.
- 1104 Kääh, A., Leinss, S., Gilbert, A., Buhler, Y., Gascoïn, S., Evans, S. G., Bartelt, P., Berthier, E., Brun, F., Chao, W. A.,  
Farinotti, D., Gimbert, F., Guo, W. Q., Huggel, C., Kargel, J. S., Leonard, G. J., Tian, L. D., Treichler, D., and Yao,  
T. D.: Massive collapse of two glaciers in western Tibet in 2016 after surge-like instability, *Nat Geosci*, 11, 114-120,  
1106 <https://doi.org/10.1038/s41561-017-0039-7>, 2018.
- 1108 Kääh, A.: Collapsing Glaciers, *Geophysical Research Abstracts*, European Geosciences Union General Assembly 2019, Vol.  
21, 8799, 2019.
- 1110 Larsen, C. F., Burgess, E., Arendt, A. A., O'Neel, S., Johnson, A. J., and Kienholz, C.: Surface melt dominates Alaska  
glacier mass balance, *Geophys Res Lett*, 42, 5902-5908, <https://doi.org/10.1002/2015gl064349>, 2015.



- 1112 Leinss, S., Willmann, C., and Hajsek, I.: Glacier Detachment Hazard Analysis in the West Kunlun Shan Mountains, *Int Geosci Remote Se*, 4565-4568, 2019.
- 1114 Leinss, S., Bernardini, E., Jacquemart, M., and Dokukin, M.: Glacier detachments and rock-ice avalanches in the Petra Pervogo range, Tajikistan (1973–2019), *Nat. Hazards Earth Syst. Sci. Discuss.*, <https://doi.org/10.5194/nhess-2020-285>, in review, 2020.
- 1116 Liu, C. Z., Lu, J. T., Tong, L. Q., Chen, H. Q., Liu, Q. Q., Xiao, R. H., and Tu, J. N.: Research on glacial/rock fall-landslide-debris flows in Sedongpu basin along Yarlung Zangbo River in Tibet, *Geol. China*, 46, 219-234, 2019.
- 1118 Lv, M. Y., Guo, H. D., Lu, X. C., Liu, G., Yan, S. Y., Ruan, Z. X., Ding, Y. X., and Quincey, D. J.: Characterizing the behaviour of surge-and non-surge-type glaciers in the Kingata Mountains, eastern Pamir, from 1999 to 2016, *Cryosphere*, 13, 219-236, <https://doi.org/10.5194/tc-13-219-2019>, 2019.
- 1122 Marangunic, C.: Informe sobre deslizamientos de glaciares en el Estero del Aparejo, Valle del Rio Maipo, Área Metropolitana, Oficina Nacional de Emergencias, Santiago, Chile, 8p, 1980.
- 1124 Masiokas, M. H., Christie, D. A., Le Quesne, C., Pitte, P., Ruiz, L., Villalba, R., Luckman, B. H., Berthier, E., Nussbaumer, S. U., Gonzalez-Reyes, A., McPhee, J., and Barcaza, G.: Reconstructing the annual mass balance of the Echaurren Norte glacier (Central Andes, 33.5 degrees S) using local and regional hydroclimatic data, *Cryosphere*, 10, 927-940, <https://doi.org/10.5194/tc-10-927-2016>, 2016.
- 1128 McClung, D. M.: Superelevation of flowing avalanches around curved channel bends, *J Geophys Res-Sol Ea*, 106, 16489-16498, <https://doi.org/Doi.10.1029/2001jb000266>, 2001.
- 1130 Mergili, M., Kopf, C., Müllebner, B., and Schneider, J. F.: Changes of the Cryosphere and Related Geohazards in the High-Mountain Areas of Tajikistan and Austria: A Comparison, *Geogr Ann A*, 94A, 79-96, <https://doi.org/10.1111/j.1468-0459.2011.00450.x>, 2012.
- 1132 Moore, P. L.: Deformation of debris-ice mixtures, *Rev Geophys*, 52, 435-467, <https://doi.org/10.1002/2014rg000453>, 2014.
- 1134 Murray, T., Strozzii, T., Luckman, A., Jiskoot, H., and Christakos, P.: Is there a single surge mechanism? Contrasts in dynamics between glacier surges in Svalbard and other regions, 108, 2237, <https://doi.org/10.1029/2002JB001906>, 2003.
- 1136 Obu, J., Westermann, S., Bartsch, A., Berdnikov, N., Christiansen, H. H., Dashtseren, A., Delaloye, R., Elberling, B., Etmüller, B., Kholodov, A., Khomutov, A., Kaab, A., Leibman, M. O., Lewkowicz, A. G., Panda, S. K., Romanovsky, V., Way, R. G., Westergaard-Nielsen, A., Wu, T. H., Yamkhin, J., and Zou, D. F.: Northern Hemisphere permafrost map based on TTOP modelling for 2000-2016 at 1 km(2) scale, *Earth-Sci Rev*, 193, 299-316, <https://doi.org/10.1016/j.earscirev.2019.04.023>, 2019.
- 1142 Paul, F.: Repeat Glacier Collapses and Surges in the Amney Machen Mountain Range, Tibet, Possibly Triggered by a Developing Rock-Slope Instability, *Remote Sens-Basel*, 11, <https://doi.org/ARTN.708>, 10.3390/rs11060708, 2019.
- 1144 Pavez, C., Tapia, F., Comte, D., Gutierrez, F., Lira, E., Charrier, R., and Benavente, O.: Characterization of the hydrothermal system of the Tinguiririca Volcanic Complex, Central Chile, using structural geology and passive seismic tomography, *J Volcanol Geoth Res*, 310, 107-117, <https://doi.org/10.1016/j.jvolgeores.2015.11.018>, 2016.
- 1146 Petrakov, D. A., Chernomorets, S. S., Evans, S. G., and Tutubalina, O. V.: Catastrophic glacial multi-phase mass movements: a special type of glacial hazard, 14, 211-218, 2008.
- 1148 Petrakov, D. A., Aristov, K. A., A.A., A., Boyko, E. S., Drobyshev, V. N., Kovalenko, N. V., Tutubalina, O. V., and Chernomorets, S. S.: Rapid regeneration of the Kolka Glacier (Caucasus) after the 2002 glacial disaster Earth's Cryosphere (Kriosfera Zemli), 22, 51–62, [https://doi.org/DOI:10.21782/EC2541-9994-2018-1\(51-62\)](https://doi.org/DOI:10.21782/EC2541-9994-2018-1(51-62)) 2018.
- 1150 Post, A.: Effects on Glaciers, in: The great Alaska earthquake of 1964. Part A: hydrology, National Academy of Sciences, Washington DC, 266-308, 1968.
- 1152 Quincey, D. J., Glasser, N. F., Cook, S. J., and Luckman, A.: Heterogeneity in Karakoram glacier surges, *J Geophys Res-Earth*, 120, 1288-1300, <https://doi.org/10.1002/2015jf003515>, 2015.
- 1156 Reineggs, J. Allgemeine historisch- topographische Beschreibung des Kaukasus. - Gotha; St. Petersburg, Bd. 1, 296 S., <http://elib.shpl.ru/ru/nodes/24706-bd-1-1796>, 1796.



- 1158 Rototayev, K. P., Khodakov, V. G., and Krenke, A. N.: Study of the Surging Kolka Glacier, Nauka, Moscow, 168 pp. (in  
Russian), 1983.
- 1160 Schneider, D., Huggel, C., Haeblerli, W., and Kaitna, R.: Unraveling driving factors for large rock-ice avalanche mobility,  
Earth Surf. Proc. Land., 36, 1948-1966, <https://doi.org/10.1002/esp.2218>, 2011.
- 1162 Sevestre, H., and Benn, D. I.: Climatic and geometric controls on the global distribution of surge-type glaciers: Implications  
for a unifying model of surging, *J. Glaciol.*, 61, 646-662, <https://doi.org/10.3189/2015JoG14J136>, 2015.
- 1164 Sevestre, H., Benn, D. I., Hulton, N. R. J., and Baelum, K.: Thermal structure of Svalbard glaciers and implications for  
thermal switch models of glacier surging, *J Geophys Res-Earth*, 120, 2220-2236,  
<https://doi.org/10.1002/2015jf003517>, 2015.
- 1166 Shean, D. E., Bhushan, S., Montesano, P., Rounce, D. R., Arendt, A., and Osmanoglu, B.: A Systematic, Regional  
Assessment of High Mountain Asia Glacier Mass Balance, *Front Earth Sc-Switz*, 7, <https://doi.org/ARTN 363>,  
10.3389/feart.2019.00363, 2020.
- 1170 Sheridan, M. F., Stinton, A. J., Patra, A., Pitman, E. B., Bauer, A., and Nichita, C. C.: Evaluating Titan2D mass-flow model  
using the 1963 Little Tahoma Peak avalanches, Mount Rainier, Washington, *J Volcanol Geoth Res*, 139, 89-102,  
<https://doi.org/10.1016/j.jvolgeores.2004.06.011>, 2005.
- 1172 Shugar, D. H., Rabus, B. T., Clague, J. J., and Capps, D. M.: The response of Black Rapids Glacier, Alaska, to the Denali  
earthquake rock avalanches, *J Geophys Res-Earth*, 117, <https://doi.org/Artn F01006>, 10.1029/2011jf002011, 2012.
- 1174 Statkowski, B. I. Origin of repeating Kazbek blockage and measures for its prevention. Tiflis (in Russian), 1877.
- 1176 Statkowski, B. Problèmes de la Climatologie du Caucase. Paris, Gauthier-Villars, Imprimeur-Librairie. Successeur de Mallet-  
Bachelier. 279 p. <https://gallica.bnf.fr/ark:/12148/bpt6k9643218p.texteImage>, 1879.
- 1178 Stebnitsky, I. I. On the distribution of glaciers in the Caucasus. – *Izvestiya Kavkazskogo otdela Imperatorskago Russkago*  
*Geograficheskago Obschestva*, V(1): 1-21 (in Russian), 1877.
- 1180 Strom, A., and Abdrakhmatov, K.: Rockslides and Rock Avalanches of Central Asia: Distribution, Morphology, and Internal  
Structure, Elsevier, Amsterdam, 2018.
- 1182 Tavasiev, R. A., and Galushkin, I. V. Rock-ice collapse of Kazbek Mountain dated May 17, 2014. *Vestnik Vladikavkaz*  
*Scientific Center*, 14(2): 43-45, 2014.
- 1184 Thogersen, K., Gilbert, A., Schuler, T. V., and Malthe-Sorensen, A.: Rate-and-state friction explains glacier surge  
propagation, *Nat Commun*, 10, <https://doi.org/ARTN 2823>, 10.1038/s41467-019-10506-4, 2019.
- 1186 Tian, L. D., Yao, T. D., Gao, Y., Thompson, L., Mosley-Thompson, E., Muhammad, S., Zong, J. B., Wang, C., Jin, S. Q.,  
and Li, Z. G.: Two glaciers collapse in western Tibet, *J Glaciol*, 63, 194-197, <https://doi.org/10.1017/jog.2016.122>,  
2017.
- 1188 Tielidze, L. G., Kumladze, R. M., Wheate, R. D., and Gamkrelidze, M. The Devdoraki Glacier Catastrophes, *Georgian*  
*Caucasus. Hungarian Geographical Bulletin*, 68(1), 21-35, <https://doi.org/10.15201/hungeobull.68.1.2>, 2019.
- 1190 Toney et al., 2020. Reconstructing the dynamics of the highly-similar May 2016 and June 2019 Iliamna Volcano, Alaska  
ice-rock avalanches from seismoacoustic data. <https://doi.org/10.5194/esurf-2020-47>
- 1192 Tong, L. Q., Tu, J. N., Pei, L. X., Guo, Z. C., Zheng, X. W., Fan, J. H., Zhong, X., Liu, C. L., Wang, S. S., He, P., and Chen,  
H.: Preliminary discussion of the frequent debris flow events in Sedongpu Basin at Gyala Peri peak, Yarlung Zangbo  
River, *J. Eng.Geol.*, 26, 1552-1561, <https://doi.org/10.13544/j.cnki.jeg.2018-401>, 2018.
- 1194 Treichler, D., Kääh, A., Salzmann, N., and Xu, C. Y.: Recent glacier and lake changes in High Mountain Asia and their  
relation to precipitation changes, *Cryosphere*, 13, 2977-3005, <https://doi.org/10.5194/tc-13-2977-2019>, 2019.
- 1198 Truffer, M., Harrison, W. D., and Echelmeyer, K. A.: Glacier motion dominated by processes deep in underlying till, *J*  
*Glaciol*, 46, 213-221, <https://doi.org/Doi 10.3189/172756500781832909>, 2000.
- 1200 Ugalde, F., Casassa, G., Marangunic, C., Mujica, R., and Peralta, C.: El deslizamiento catastrófico del glaciar Aparejo: 35  
años después, *XIV Congreso Geológico Chileno*, 2015,



- 1202 Ugalde, F., Marangunic, C., and Casassa, G.: Ice thickness changes at Aparejo Glacier in central Chile from interferometric  
satellite data, 76-79, 2017.
- 1204 Ugalde, F. I. P.: ESTIMACIÓN DE PELIGRO ANTE DESLIZAMIENTO DE GLACIARES EN CHILE CENTRAL: EL  
CASO DEL GLACIAR APAREJO, DEPARTAMENTO DE GEOLOGÍA, FACULTAD DE CIENCIAS FÍSICAS Y  
MATEMÁTICAS, UNIVERSIDAD DE CHILE SANTIAGO DE CHILE, 2016.
- 1206 van der Woerd, J., Owen, L. A., Tapponnier, P., Xu, X. W., Kervyn, F., Finkel, R. C., and Barnard, P. L.: Giant, similar to  
M8 earthquake-triggered ice avalanches in the eastern Kunlun Shan, northern Tibet: Characteristics, nature and  
1208 dynamics, *Geol Soc Am Bull*, 116, 394-406, <https://doi.org/10.1130/B25317.1>, 2004.
- 1210 Viskovatov, A. A. About periodic Kazbek blockage. *Zapiski Kavkazskago otdela Imperatorskago Russkago  
geograficheskago obshestva* 6: 186-219. Tiflis (in Russian), 1864.
- 1212 Wagner, S.: Dreidimensionale Modellierung zweier Gletscher und Deformationsanalyse von eisreichem Permafrost.  
Mitteilungen der Versuchsanstalt für Wasserbau, Hydrologie und Glaziologie der ETH Zürich, 146, 135pp, 1996.
- 1214 Wenying, W.: Glaciers in the north-eastern part of the Ch'ing-hai-hsi-tsang (Qinghai-Xizang) Plateau (Tibet) and their  
variations, *J Glaciol*, 29, 383-391, 1983.
- 1216 Zaporozhchenko, E. V., and Chernomorets, S. S. History and studies of Kazbek blockages. *Vestnik Kavkazskogo gornogo  
obshestva* 5: 33-54 [https://istina.msu.ru/download/8871273/1k5k36:x\\_gHoGej2TQCeFRBrQCnhJLg7eU/](https://istina.msu.ru/download/8871273/1k5k36:x_gHoGej2TQCeFRBrQCnhJLg7eU/) (in  
Russian), 2004.
- 1218 Zemp, M., Huss, M., Thibert, E., Eckert, N., McNabb, R., Huber, J., Barandun, M., Machguth, H., Nussbaumer, S. U.,  
Gartner-Roer, I., Thomson, L., Paul, F., Maussion, F., Kutuzov, S., and Cogley, J. G.: Global glacier mass changes  
1220 and their contributions to sea-level rise from 1961 to 2016, *Nature*, 568, 382-+, <https://doi.org/10.1038/s41586-019-1071-0>, 2019.
- 1222 Zhang, W. J.: Identification of Glaciers with Surge Characteristics on the Tibetan Plateau, *Ann Glaciol*, 16, 168-172, 1992.
- 1224

## Simple force balance

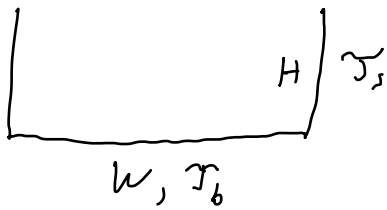

$$HW \rho g \sin \alpha = w \tau_b + 2H \tau_s$$

$$\tau_s = \left( \frac{w}{2H} \right) \rho g \sin \alpha - \frac{w}{2H} \tau_b$$

half-width  
to depth  
ratio

slope

Maximum side stress occurs for  $\tau_b = 0$

If  $\tau_{s, \max} \geq$  failure strength

$\Rightarrow$  detachment

otherwise: rapid flow or surge

till bed:  $\tau_b = N \cdot \tan \phi$

$\tan \phi$  smaller for fine grained till

hard bed: more unlikely to achieve  $N = 0$  on large spatial scale because increased bed separation would lead to more pathways for water to drain

soft bed: large scale areas of low  $N$  are easier to achieve, particularly combined with distributed water sources, such as increased geothermal heat

## Influence of sudden mass addition (rock fall)

$$\left. \begin{aligned} \Delta \tau_d &= \rho_r h_r g \sin \alpha \\ \Delta \tau_b &= \underbrace{\rho_r h_r g \cos \alpha}_{\Delta N} \cdot \tan \phi \end{aligned} \right\} \frac{\Delta \tau_b}{\Delta \tau_d} = \frac{\tan \alpha}{\tan \phi}$$

If  $\Delta \tau_b / \Delta \tau_d < 1$  then rock fall leads to more unstable configuration

Also, over time if water pressure increases and  $N$  decreases, instability can occur
